# Supplementary material
Source: PubMed Central journal article supplement (PMC4290422)

Toyama *et al.* 2015 Effects of logging and recruitment on community phylogenetic structure in 32 permanent forest plots of Kampong Thom, Cambodia. *Phil. Trans. R. Soc. B.* **370** doi: 10.1098/rstb.2014.0008

## Supplementary figures

**Figure S1.** Comparison between the estimated Bayesian phylogeny and APGIII [54] at order level. Left side is estimated phylogeny using of *rbcL* and *matK* sequences and right side is phylogeny of APG III. Nodes are labeled with Bayesian posterior probabilities. The discordance of phylogenetic relationships was shown as bold letters. The species phylogeny was shown in Figure S2.

**Figure S2.** Phylogeny of 376 plants taxa in 32 permanent samples plots of Kampong Thom, Cambodia. Clades represented by triangles in Figure S2-A are expanded in Figures S2-B to G. Branches are labeled with posterior probabilities. Asterisks show 14 nodes where prior information on the minimum age for calibration of *rbcL* and *matK* divergence under the GTR + I +  $\Gamma$  and an uncorrelated lognormal (UCLN) relaxed-clock model.

**Figure S3.** Temporal change of species richness (SR), phylogenetic diversity (PD) and abundance-weighted phylogenetic diversity (PDab). Gray lines represent the change of index in each plot and black line represents the mean value among plots. Asterisks show that statistically significant change of mean value per year between two consecutive investigated years (\*\* $p < 0.001$ , \*\* $p < 0.01$ , \* $p < 0.05$ , permutation test).

**Figure S4.** Temporal change of a) standardized mean pairwise distance (st $\alpha$ MPD), b) standardized abundance-weighted MPD (st $\alpha$ MPDab), c) standardized mean nearest taxon distance (st $\alpha$ MNTD) and d) abundance-weighted MNTD (st $\alpha$ MNTDab). Gray lines represent the change of index in each plot and black line represents the mean value among plots. Asterisks show that phylogenetic evenness and clustering tested by 9,999 randomization of taxa labels (\*\* $p < 0.01$ , \* $p < 0.05$ ).

**Figure S5.** Temporal change of a) standardized mean pairwise distance of an evergreen plot to deciduous plots (st $\beta$ MPD<sub>ED</sub>), b) standardized mean pairwise distance of an evergreen plot to evergreen plots (st $\beta$ MPD<sub>EE</sub>), c) abundance-weighted st $\beta$ MPD<sub>ED</sub> (st $\beta$ MPDab<sub>ED</sub>) and d) abundance-weighted st $\beta$ MPD<sub>EE</sub> (st $\beta$ MPDab<sub>EE</sub>). Gray lines

represent the change of index in each plot and black line represents the mean value among plots. Asterisks show that statistically significant change of mean value per year between two consecutive investigated years (\*\* $p < 0.001$ , \*\* $p < 0.01$ , \* $p < 0.05$ , permutation test).

**Figure S6.** The relationship between change of species richness and a)  $\alpha$ MPD, b)  $\alpha$ MPD<sub>ab</sub>, c)  $\alpha$ MNTD, d)  $\alpha$ MNTD<sub>ab</sub>. Black circles represent the amount of change during 1998–2000. Blue circles represent the amount of change during 2001–2004. Red circles represent the amount of change during 2005–2010. Significant Pearson's product-moment correlation coefficients adjusted by Bonferroni's method were observed in b) 2005–2010 (red line,  $y = 1.91x$ ,  $p < 0.01$ ), c) 1998–2000 (black line,  $y = -3.14x$ ,  $p < 0.01$ ), c) 2005–2010 (red line,  $y = -3.94x$ ,  $p < 0.001$ ), d) 1998–2000 (black line,  $y = -4.43x$ ,  $p < 0.001$ ) and d) 2005–2010 (red line,  $y = -3.16x$ ,  $p < 0.001$ ).

**Figure S7.** The relationship between change of species richness and a)  $\beta$ MPD<sub>ED</sub>, b)  $\beta$ MPD<sub>abED</sub>, c)  $\beta$ MPD<sub>EE</sub> and d)  $\beta$ MPD<sub>abEE</sub>. Black circles represent the amount of change during 1998–2000. Blue circles represent the amount of change during 2001–2004. Red circles represent the amount of change during 2005–2010. Significant Pearson's product-moment correlation coefficients adjusted by Bonferroni's method were observed in a) 2001–2004 (blue line,  $y = 0.98x$ ,  $p < 0.01$ ) and c) 2000–2004 (blue line,  $y = 0.97x$ ,  $p < 0.01$ ).

Figure S1

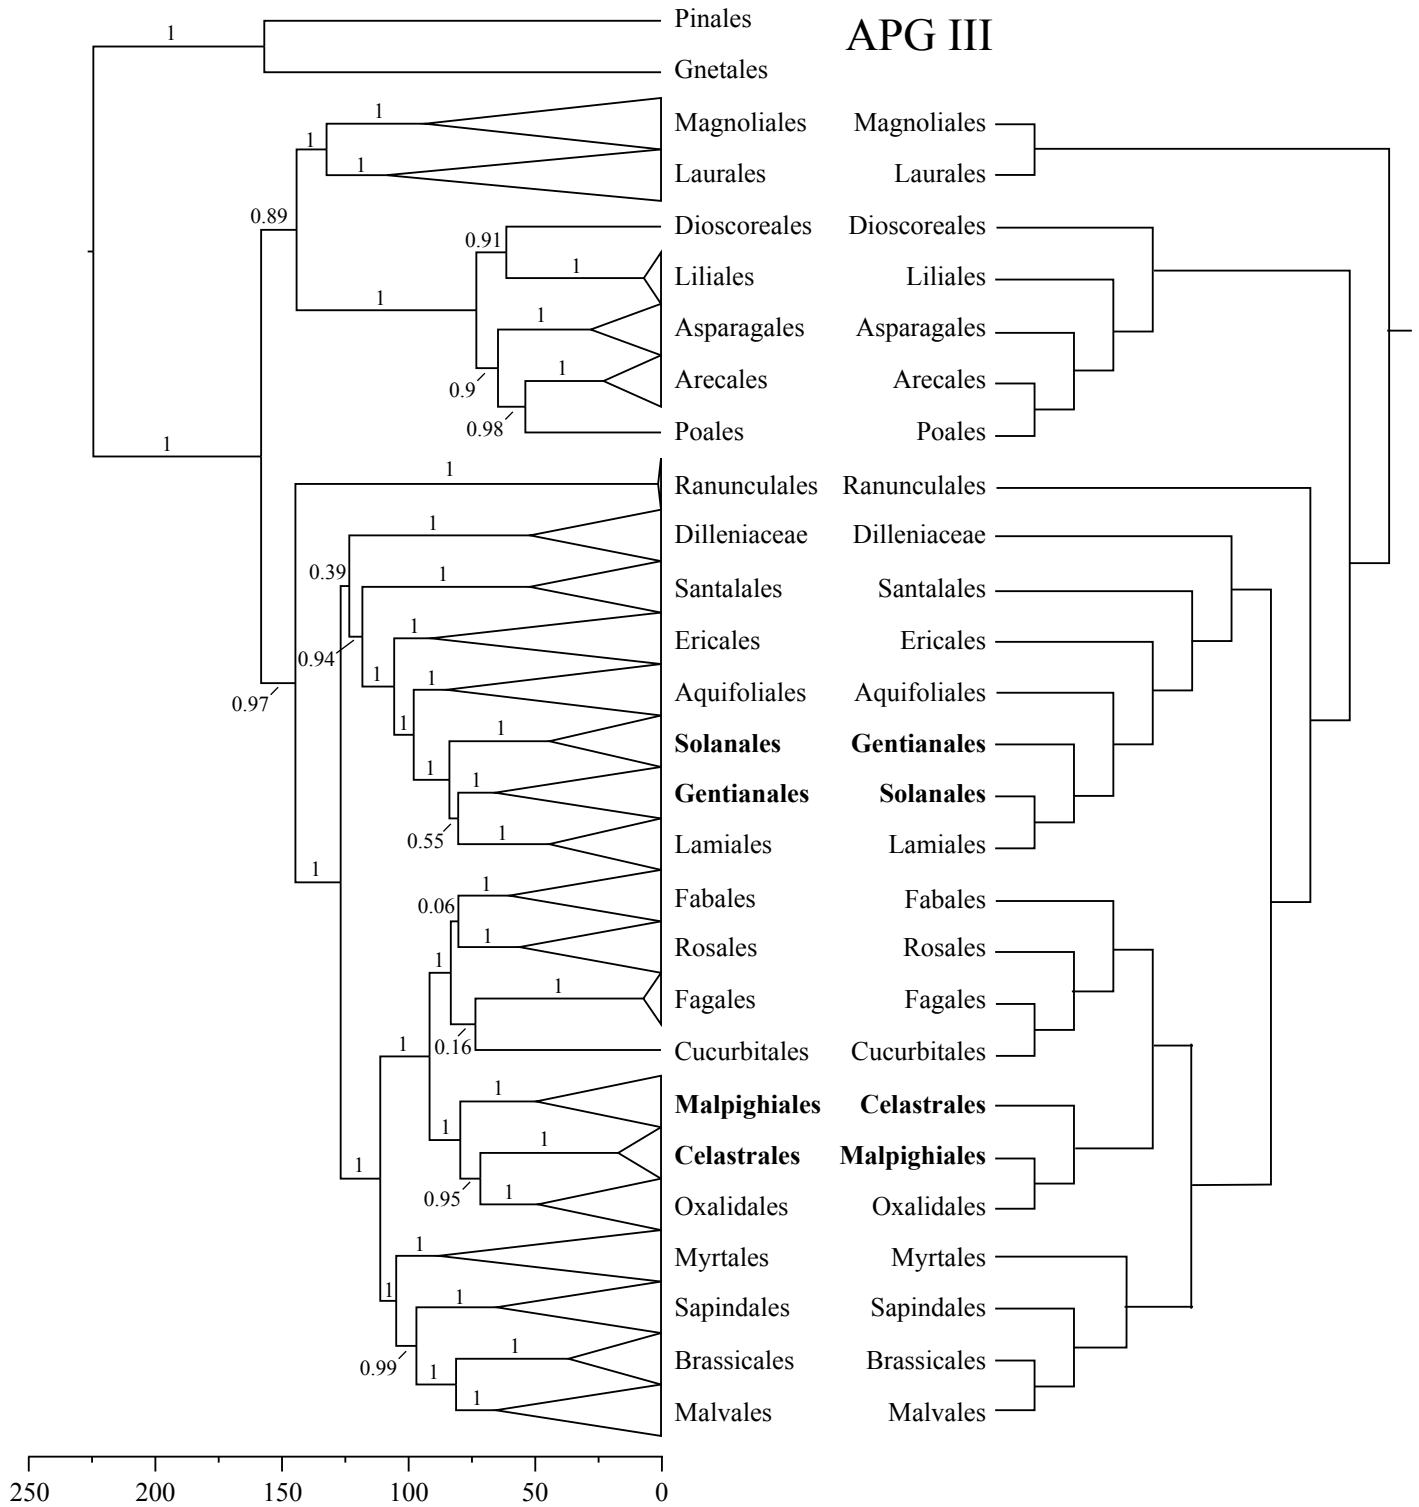

Figure S2-A

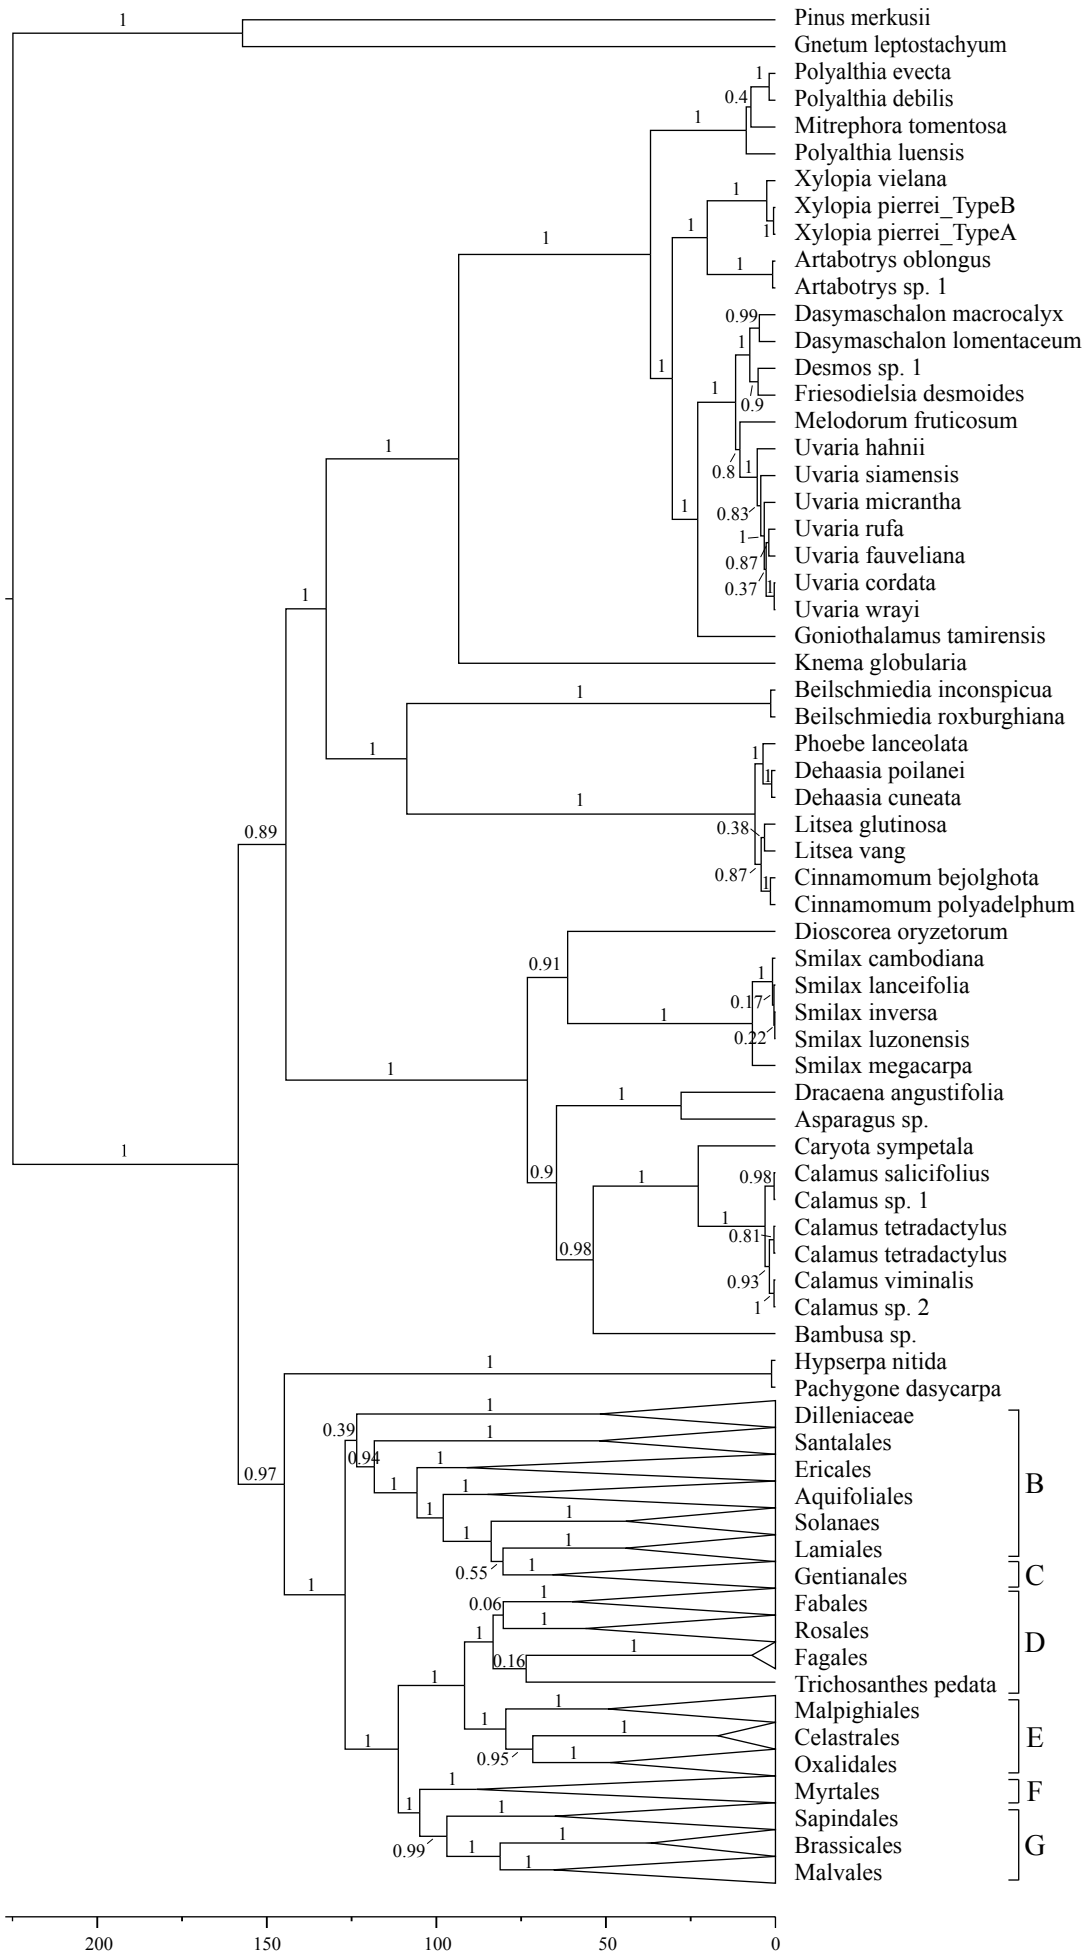



Figure S2-C

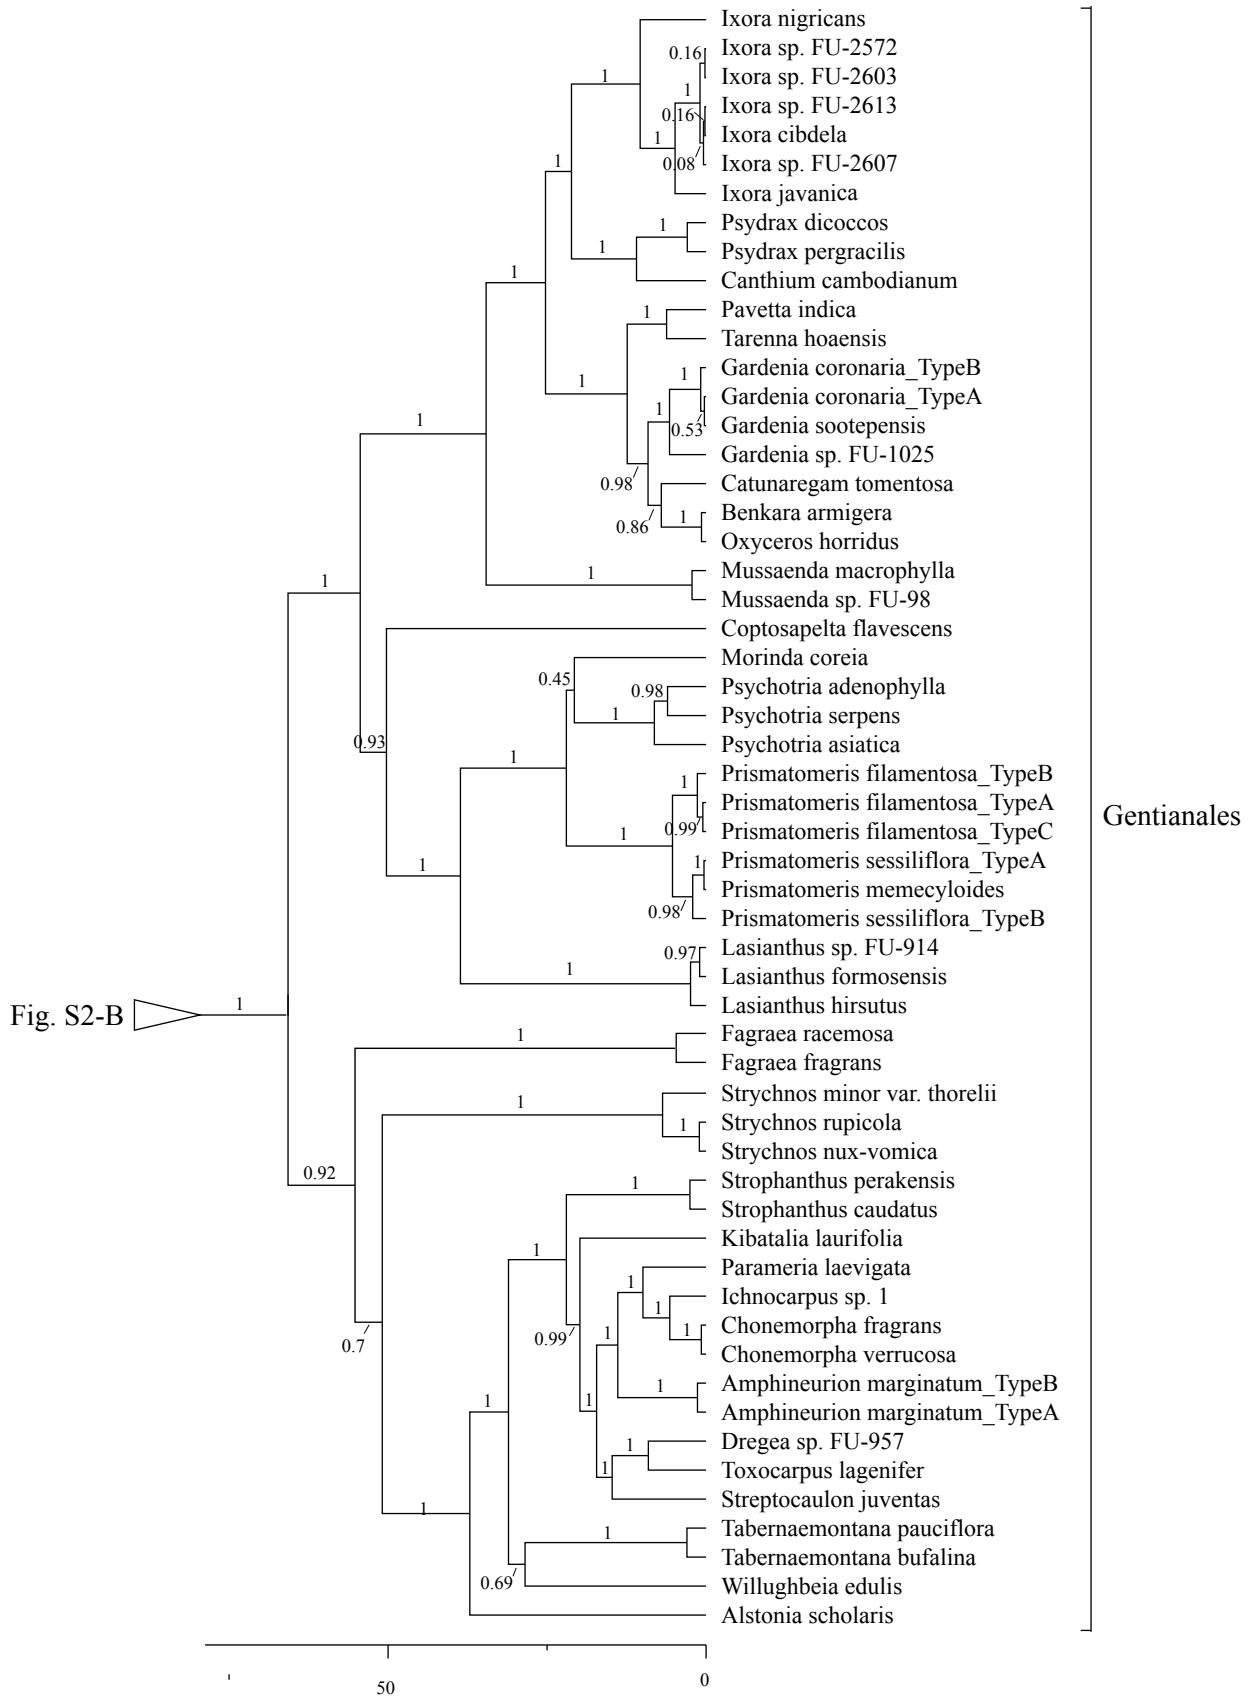

Fig. S2-B

Figure S2-D

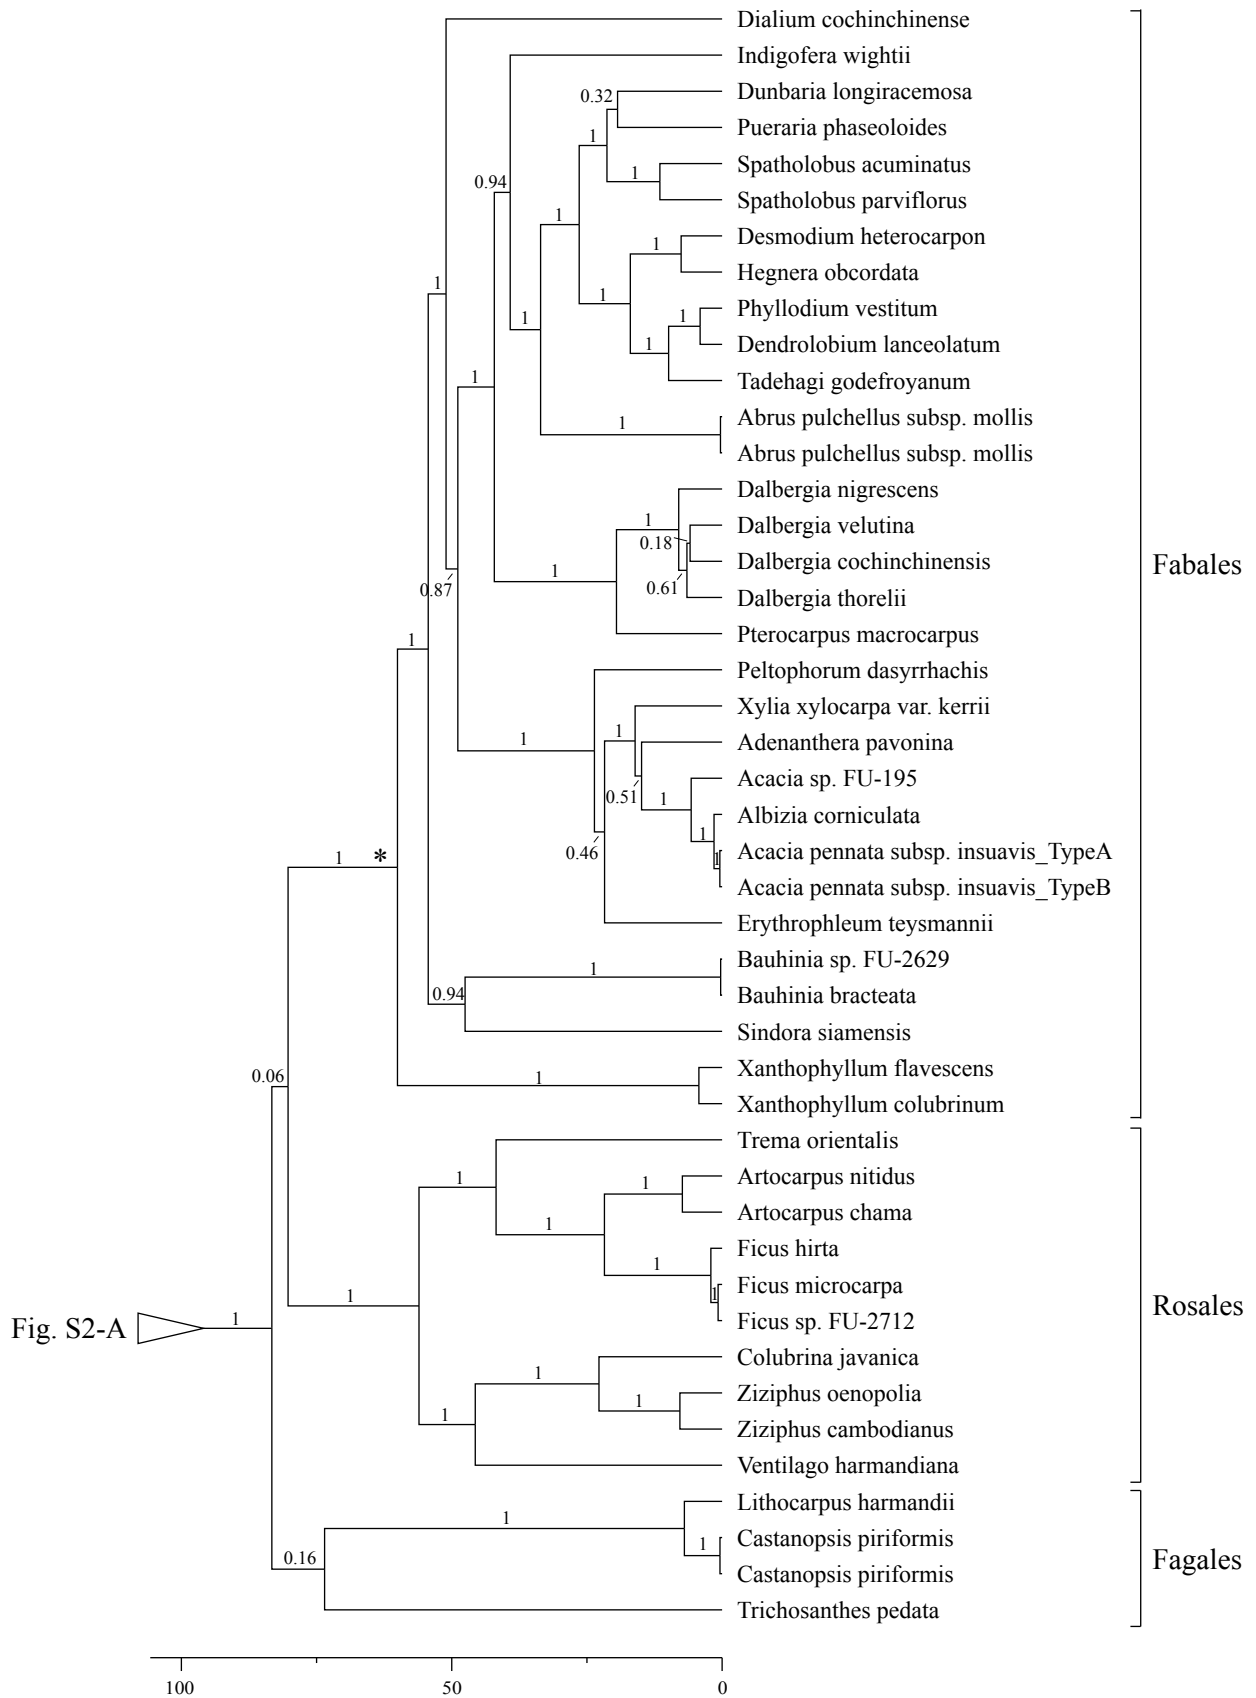

Figure S2-E

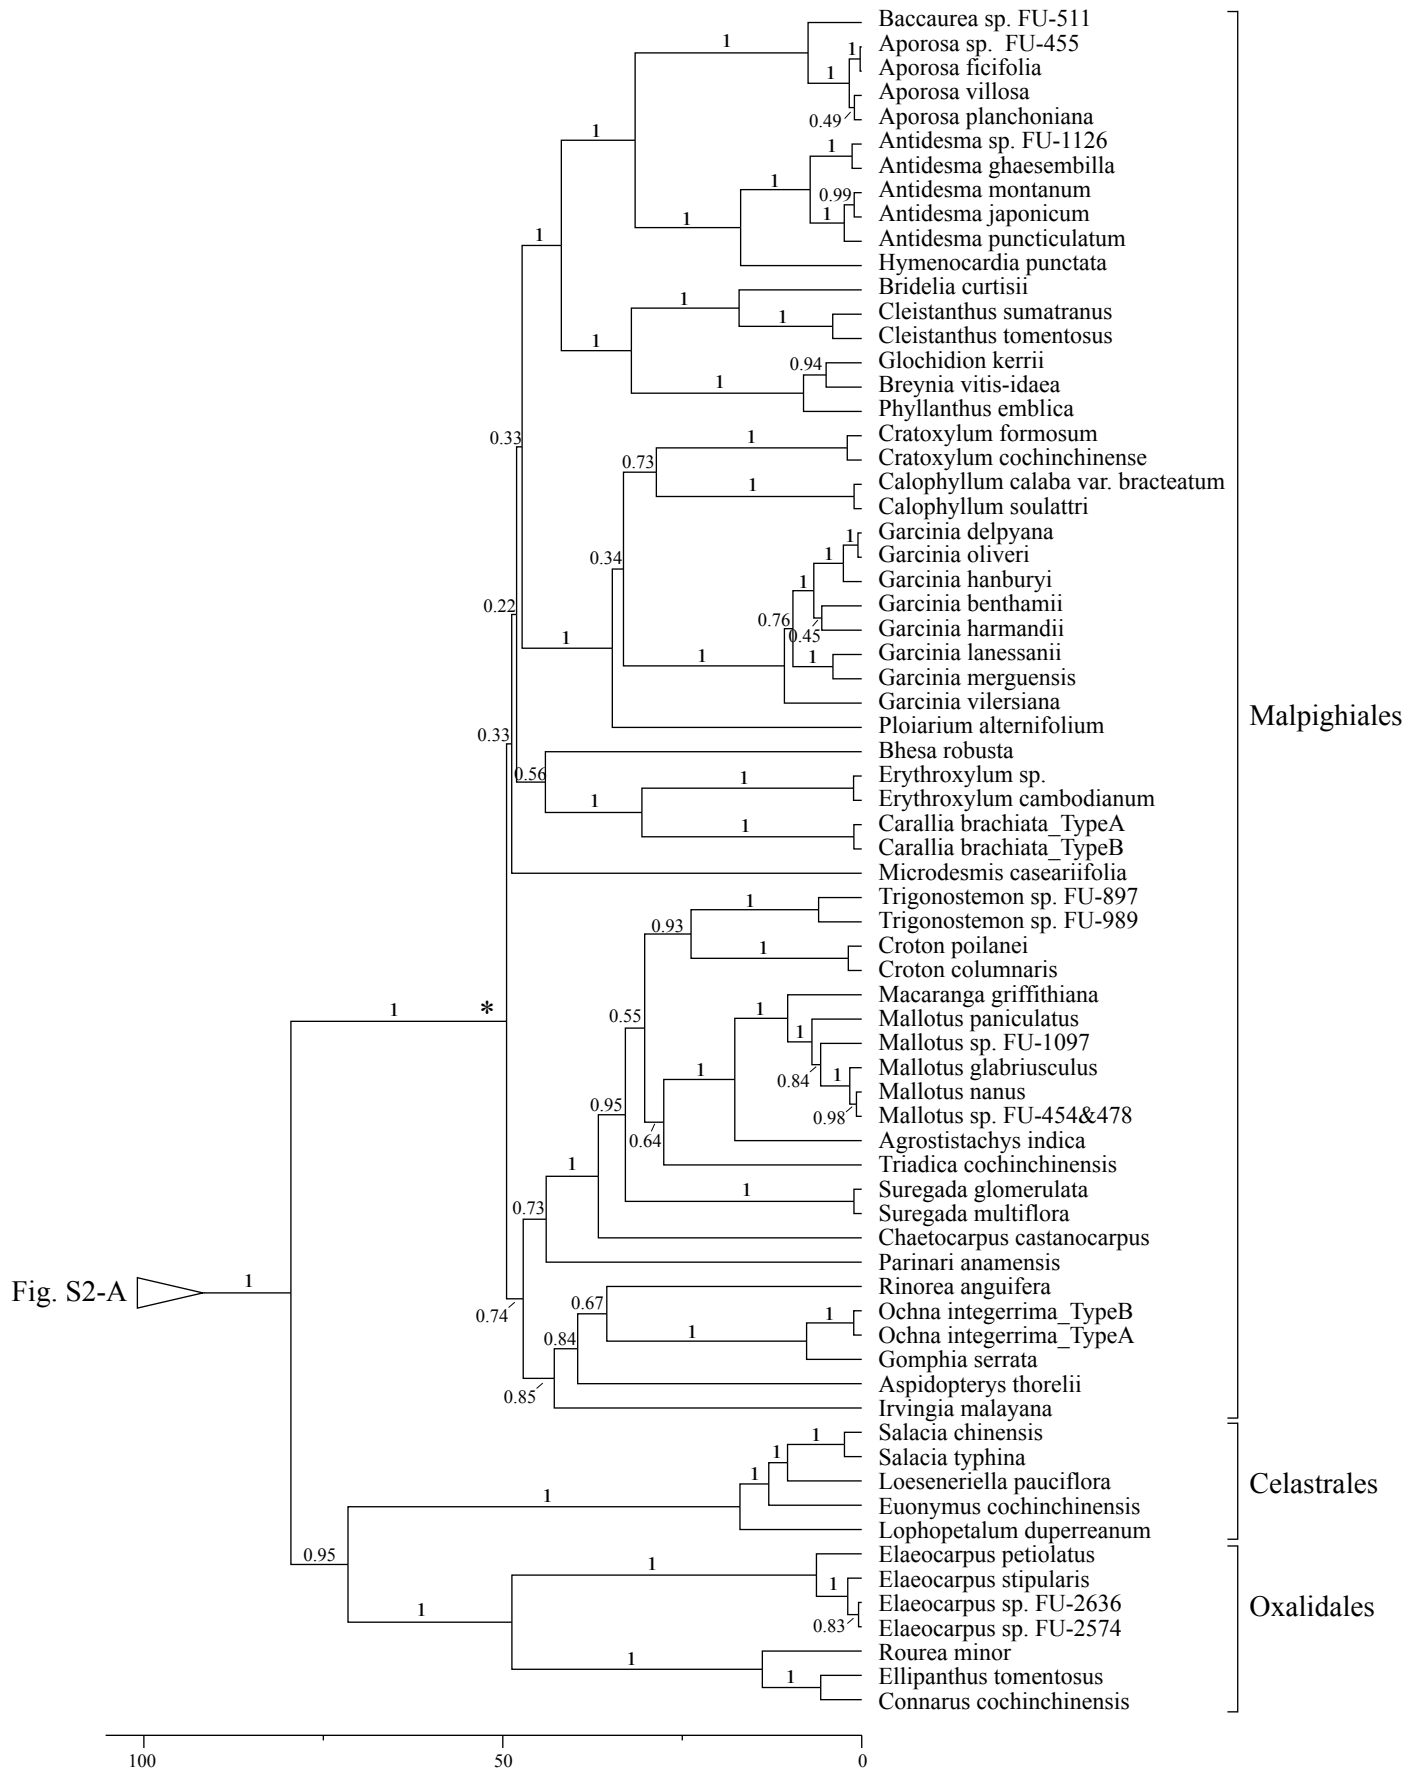



Figure S2-F

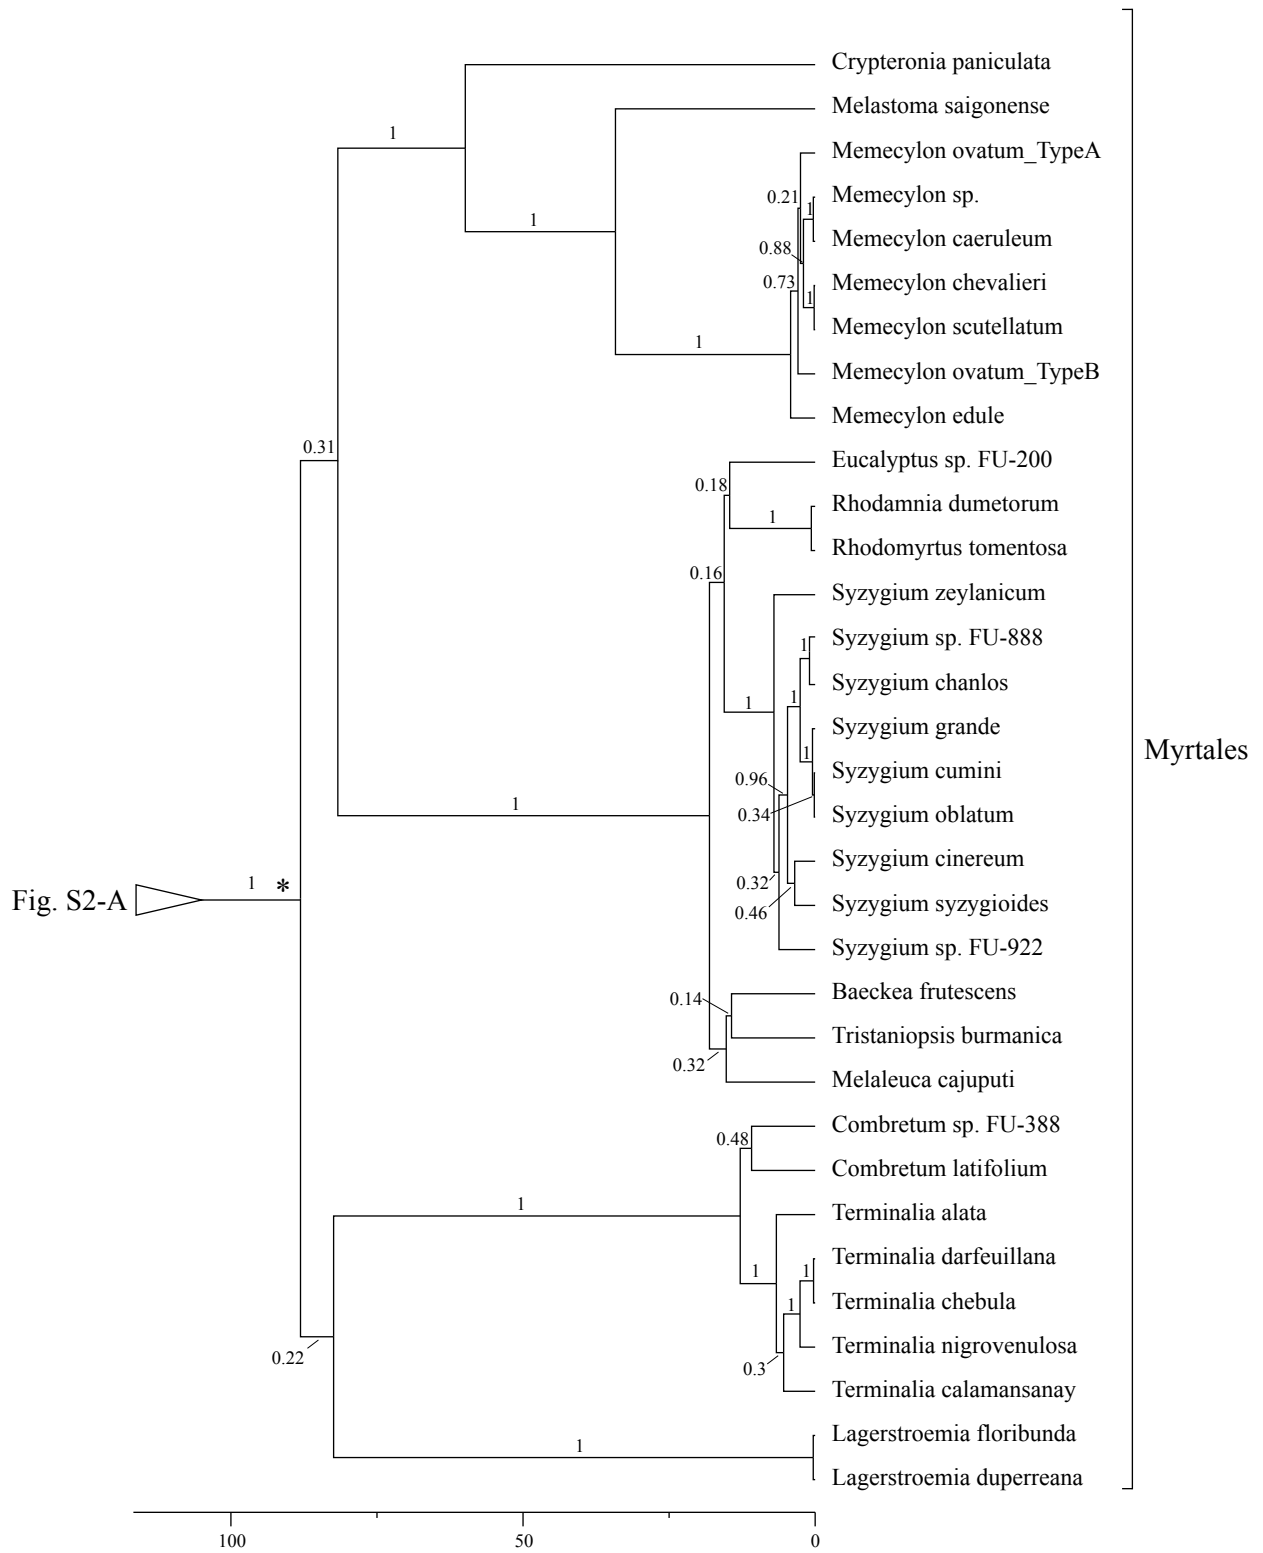

Figure S2-G

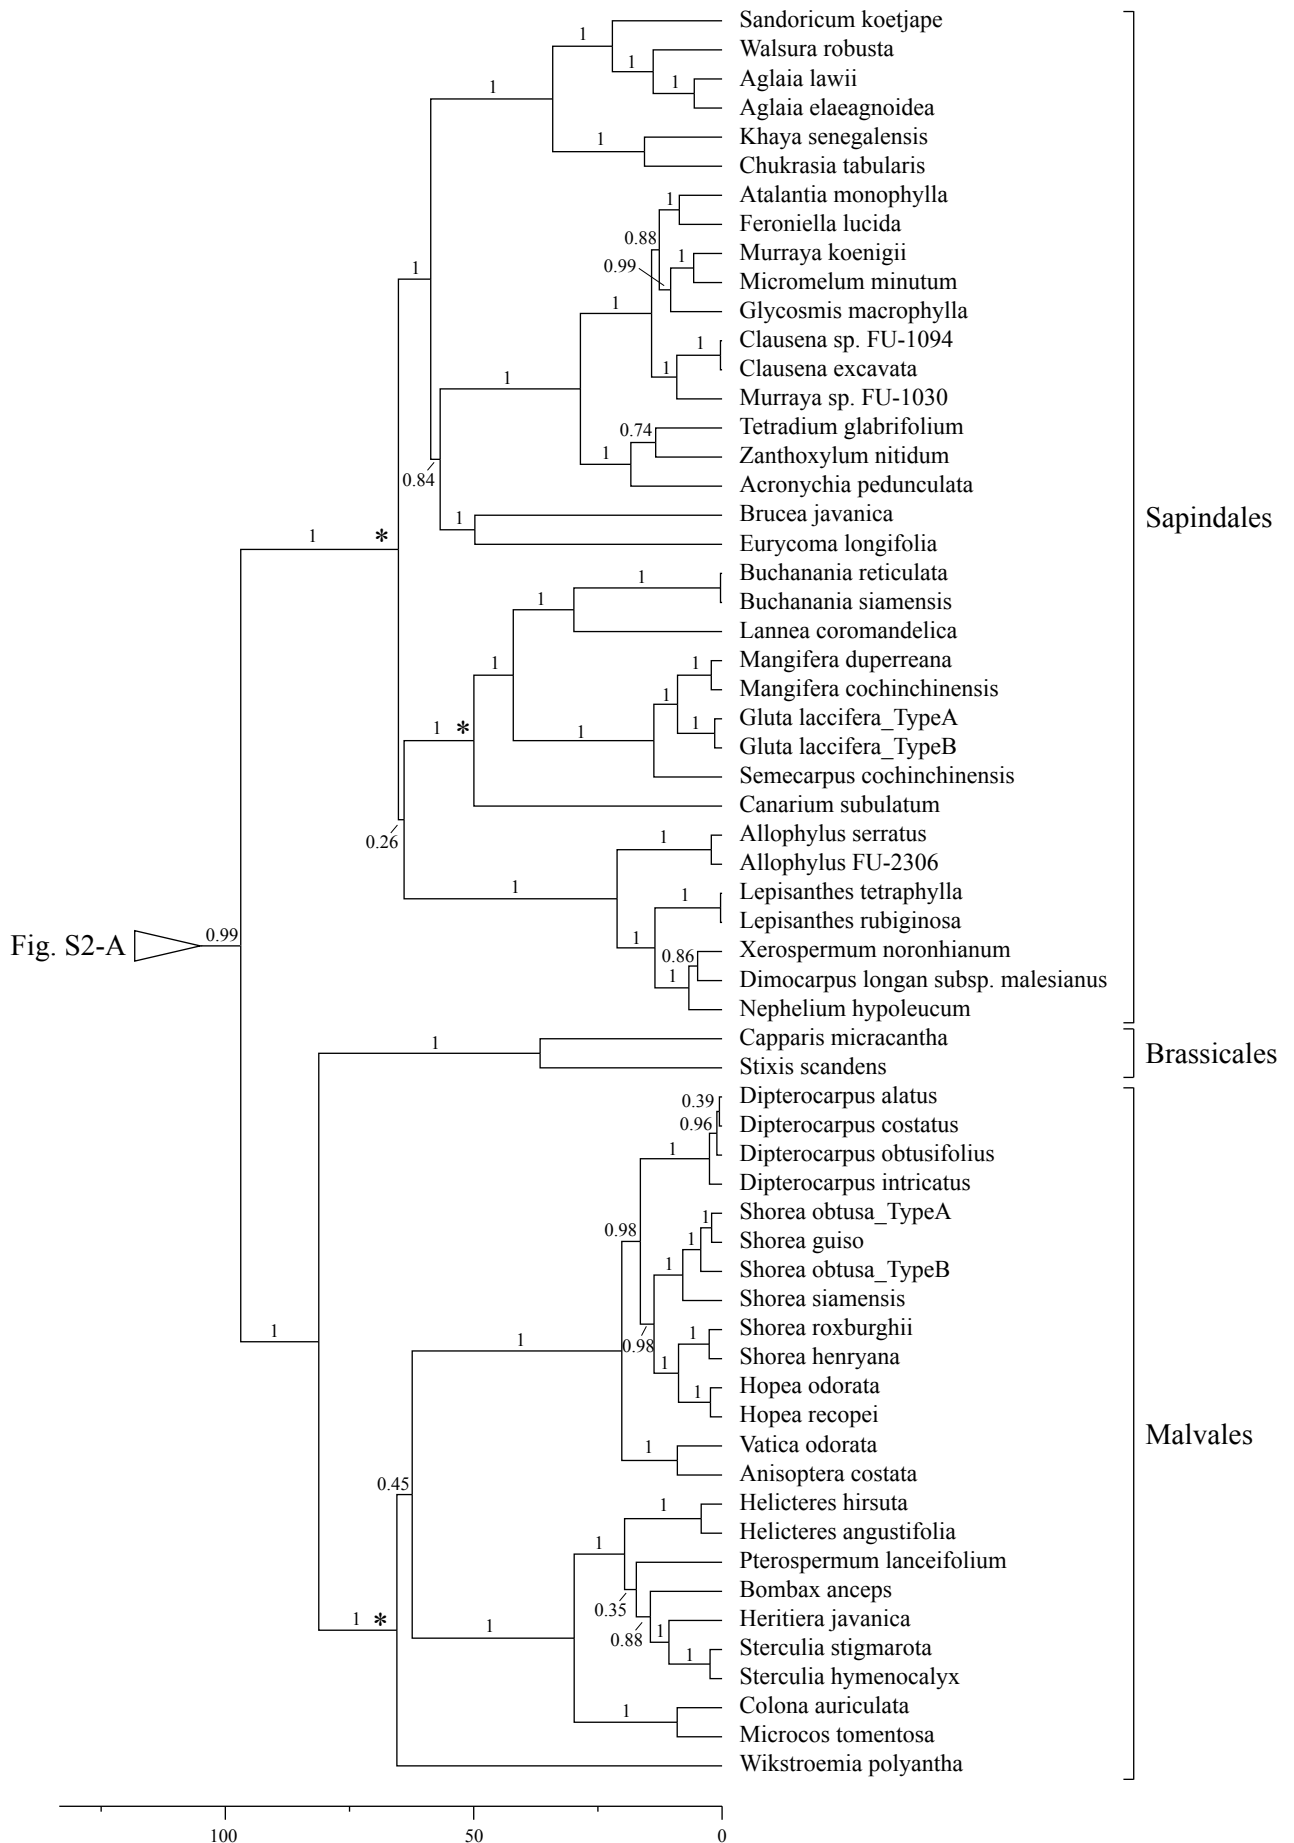

Figure S3

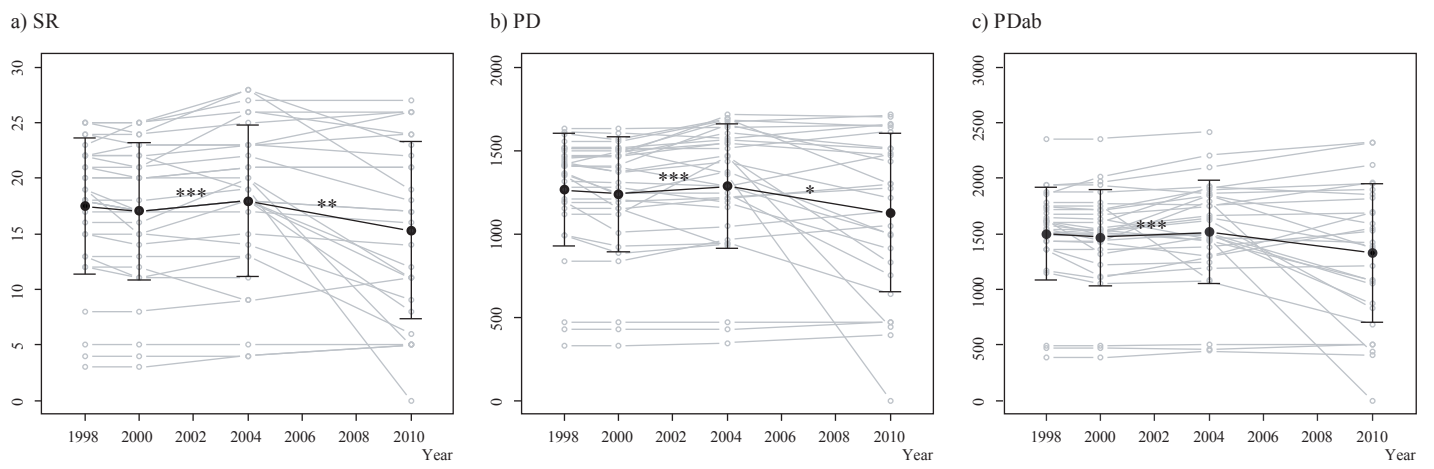

Figure S4

a)  $st\alpha MPD$

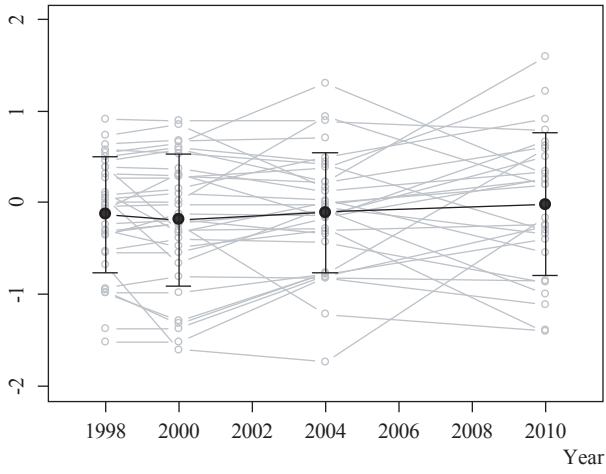

b)  $st\alpha MPDab$

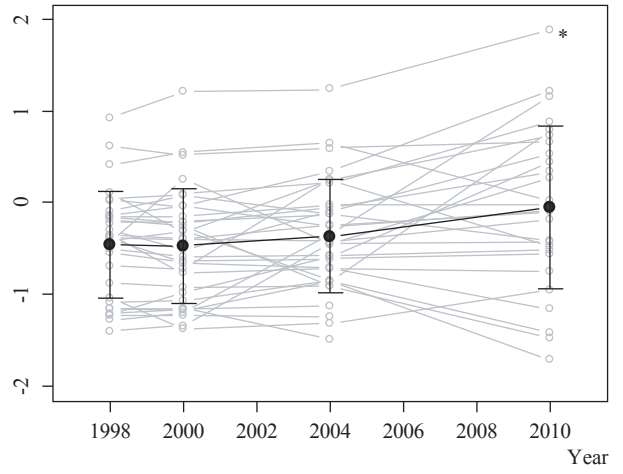

c)  $st\alpha MNTD$

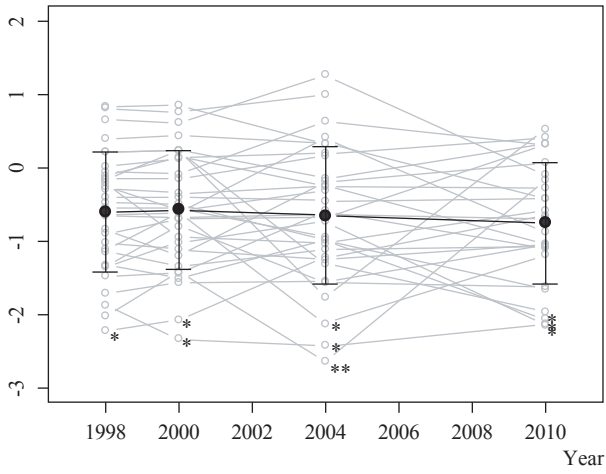

d)  $st\alpha MNTDab$

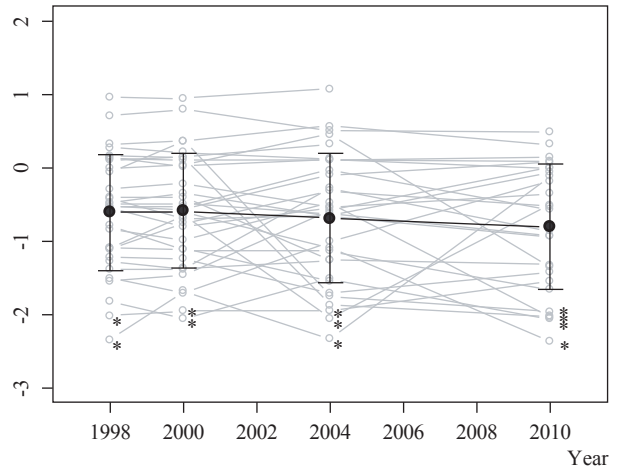

Figure S5

a)  $st\beta MPD_{ED}$

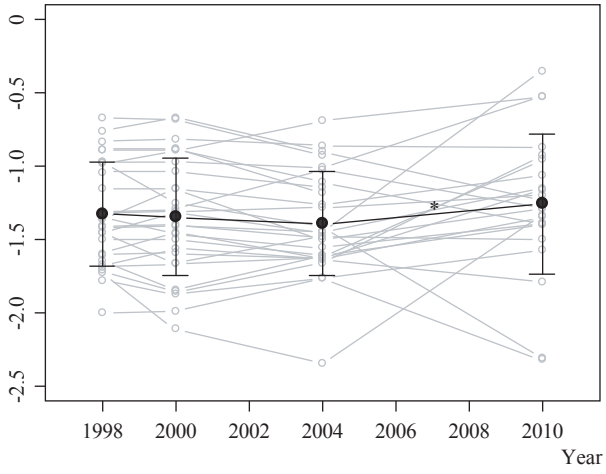

b)  $st\beta MPD_{EE}$

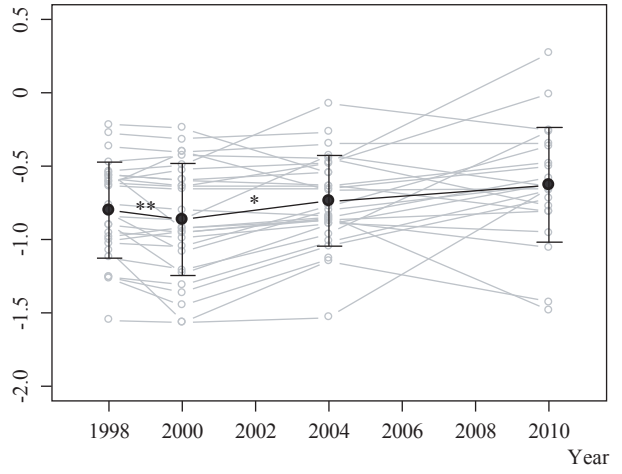

c)  $st\beta MPD_{abED}$

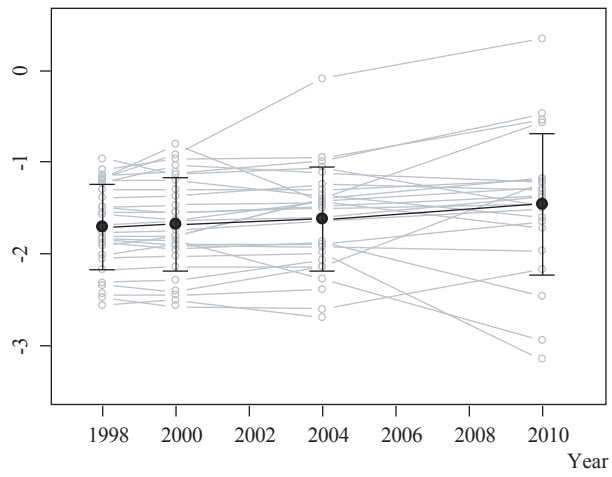

d)  $st\beta MPD_{abEE}$

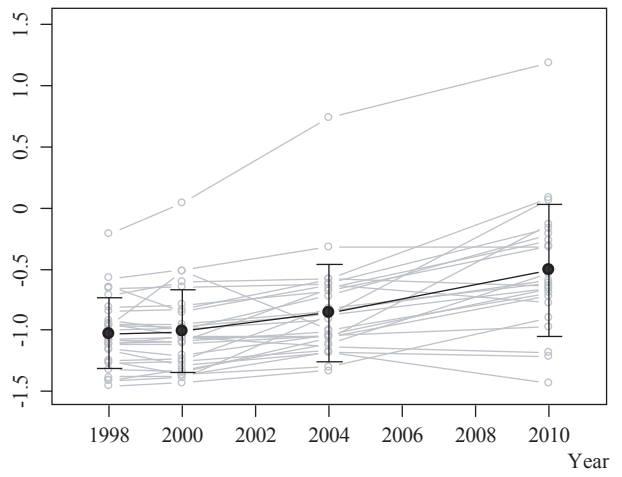

Figure S6

a)  $\alpha$ MPD

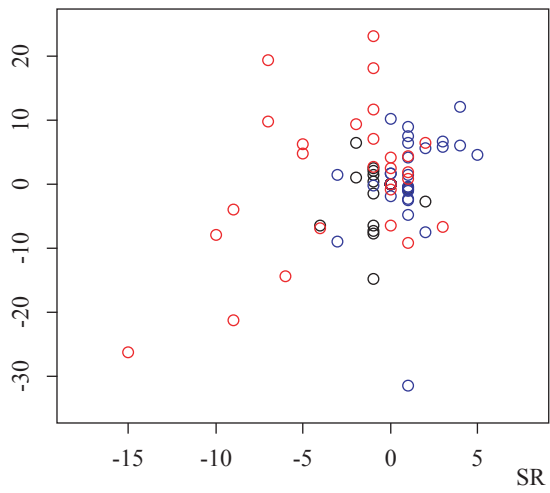

b)  $\alpha$ MPDab

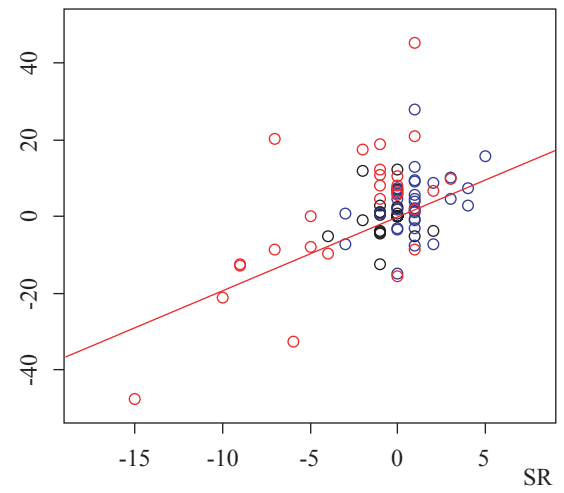

c)  $\alpha$ MNTD

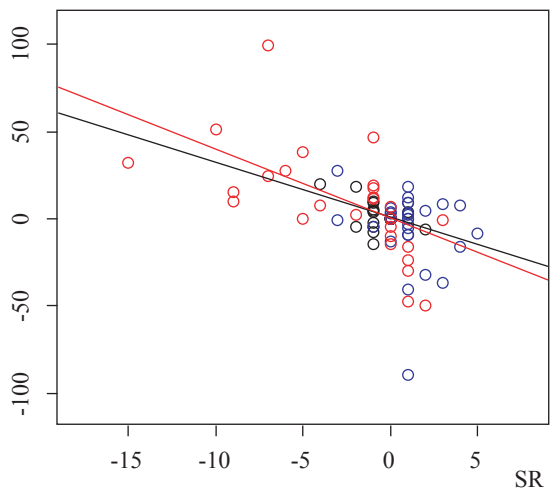

d)  $\alpha$ MNTDab

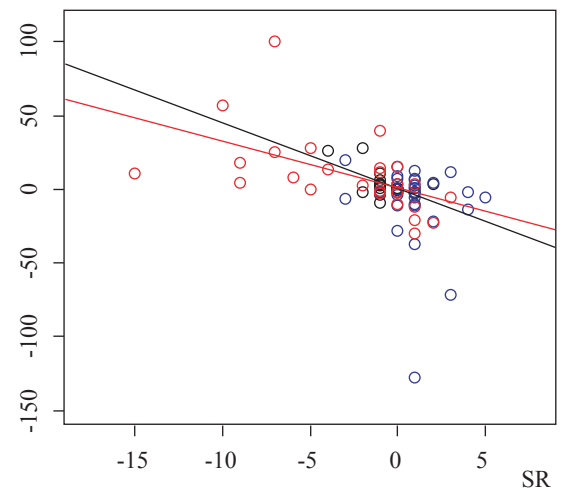

Figure S7

a)  $\beta\text{MPD}_{\text{ED}}$

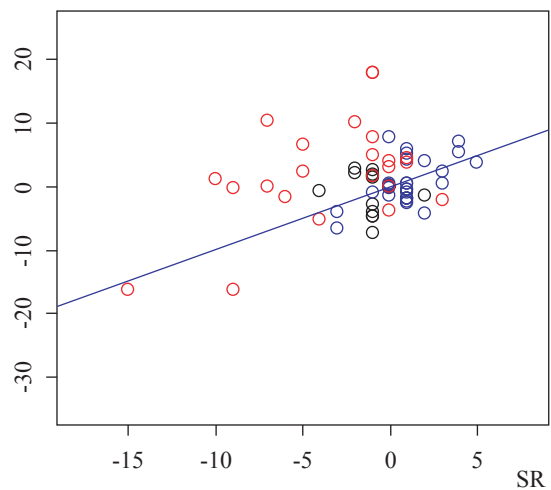

b)  $\beta\text{MPD}_{\text{abED}}$

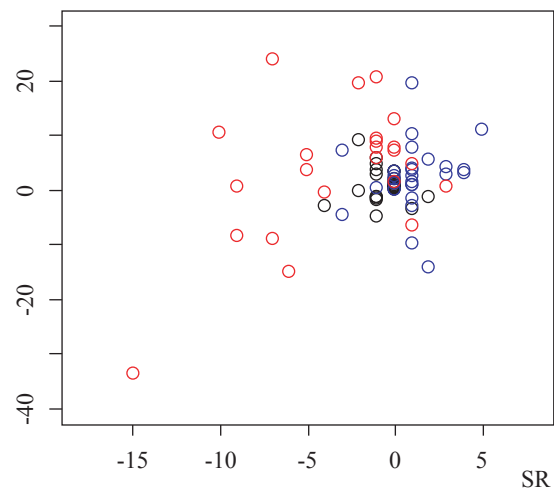

c)  $\beta\text{MPD}_{\text{EE}}$

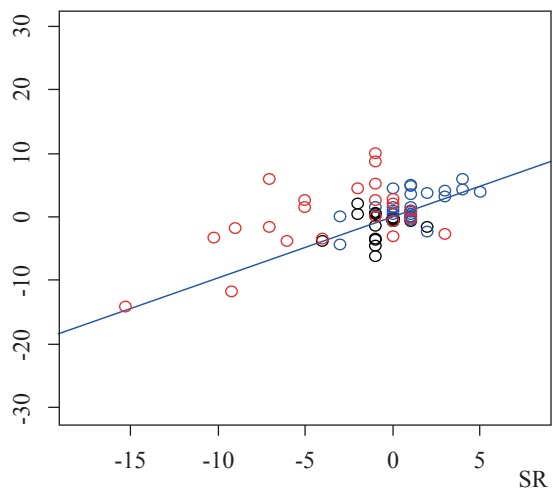

d)  $\beta\text{MPD}_{\text{abEE}}$

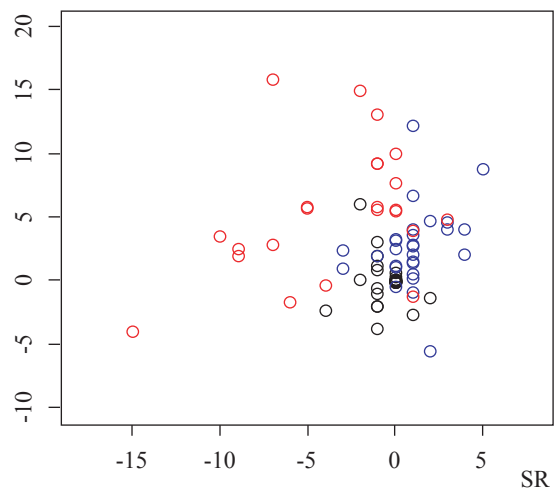

Supplement: rstb20140008supp1.pdf [file rstb20140008supp1.pdf]
