# Supplementary material
Source: PubMed Central journal article supplement (PMC4290422)
Supplement: rstb20140008supp2.pdf [file rstb20140008supp2.pdf]

Table S1. Species list with specimen No. in FU, GPS and accession No. in DNA database.

| Scientific name                                     | Specimen No. | Latitude  | Longitude  | Accession No. (rbcL) | Accession No. (matK) |
|-----------------------------------------------------|--------------|-----------|------------|----------------------|----------------------|
| <i>Chaetocarpus castanocarpus</i>                   | 1            | N 12.5779 | E 105.3622 | AB925285             | AB924678             |
| <i>Nephelium hypoleucum</i>                         | 2            | N 12.5779 | E 105.3622 | AB925286             | AB924679             |
| <i>Ellipanthus tomentosus</i>                       | 3            | N 12.5779 | E 105.3622 | AB925287             | AB924680             |
| <i>Vatica odorata</i>                               | 4            | N 12.5779 | E 105.3622 | AB925288             | AB924681             |
| <i>Aporosa ficifolia</i>                            | 5            | N 12.5778 | E 105.3623 | AB925289             | AB924682             |
| <i>Clerodendrum cochinchinense</i>                  | 6            | N 12.5778 | E 105.3623 | AB925290             | AB924683             |
| <i>Ixora cibdela</i>                                | 7            | N 12.5776 | E 105.362  | AB925291             | -                    |
| <i>Garcinia merguensis</i>                          | 8            | N 12.5773 | E 105.3618 | AB925292             | AB924684             |
| <i>Ancistrocladus tectorius</i>                     | 9            | N 12.5773 | E 105.3618 | AB925293             | -                    |
| <i>Cinnamomum polyadelphum</i>                      | 10           | N 12.5773 | E 105.3618 | AB925294             | AB924685             |
| <i>Gomphia serrata</i>                              | 11           | N 12.5772 | E 105.3617 | AB925295             | AB924686             |
| <i>Memecylon chevalieri</i>                         | 12           | N 12.5768 | E 105.3611 | AB925296             | -                    |
| <i>Agrostistachys indica</i>                        | 13           | N 12.578  | E 105.3613 | AB925297             | AB924687             |
| <i>Xerospermum noronhianum</i>                      | 14           | N 12.578  | E 105.3613 | AB925298             | AB924688             |
| <i>Pterospermum lanceifolium</i>                    | 15           | N 12.578  | E 105.3613 | AB925299             | AB924689             |
| <i>Polyalthia debilis</i>                           | 16           | N 12.578  | E 105.3613 | AB925300             | AB924690             |
| <i>Prismatomeris memecyloides</i>                   | 17           | N 12.578  | E 105.3613 | AB925301             | AB924691             |
| <i>Croton poilanei</i>                              | 18           | N 12.5769 | E 105.3613 | AB925302             | AB924692             |
| <i>Parinari anamensis</i>                           | 19           | N 12.5769 | E 105.3612 | AB925303             | AB924693             |
| <i>Willughbeia edulis</i>                           | 20           | N 12.5769 | E 105.3612 | AB925304             | AB924694             |
| <i>Salacia typhina</i>                              | 21           | N 12.5769 | E 105.3612 | AB925305             | AB924695             |
| <i>Acacia pennata</i> subsp. <i>insuavis</i> _TypeA | 22           | N 12.5769 | E 105.3612 | AB925306             | AB924696             |
| <i>Memecylon ovatum</i> _TypeA                      | 23           | N 12.5769 | E 105.3612 | AB925307             | AB924697             |
| <i>Mallotus glabriusculus</i>                       | 24           | N 12.5771 | E 105.3612 | AB925308             | AB924698             |
| <i>Diospyros venosa</i>                             | 25           | N 12.5771 | E 105.3612 | AB925309             | -                    |
| <i>Chrysophyllum roxburghii</i>                     | 26           | N 12.5771 | E 105.3612 | AB925310             | AB924699             |
| <i>Diospyros undulata</i> var. <i>cratericalyx</i>  | 27           | N 12.5771 | E 105.3612 | AB925311             | AB924700             |
| <i>Heritiera javanica</i>                           | 28           | N 12.5771 | E 105.3612 | AB925312             | AB924701             |
| <i>Aporosa planchoniana</i>                         | 29           | N 12.5773 | E 105.3612 | AB925313             | AB924702             |
| <i>Friesodielsia desmoides</i>                      | 30           | N 12.5773 | E 105.3612 | AB925314             | AB924703             |
| <i>Dehaasia cuneata</i>                             | 31           | N 12.5775 | E 105.3613 | AB925315             | AB924704             |
| <i>Xanthophyllum colubrinum</i>                     | 32           | N 12.5775 | E 105.3613 | AB925316             | AB924705             |
| <i>Diospyros filipendula</i>                        | 33           | N 12.5775 | E 105.3613 | AB925317             | AB924706             |
| <i>Anacolosa clarkii</i>                            | 34           | N 12.5775 | E 105.3613 | AB925318             | AB924707             |
| <i>Garcinia benthamii</i>                           | 36           | N 12.5779 | E 105.3613 | AB925319             | AB924708             |

Table S1. continued

| Scientific name                                  | Specimen No. | Latitude  | Longitude  | Accession No. (rbcL) | Accession No. (matK) |
|--------------------------------------------------|--------------|-----------|------------|----------------------|----------------------|
| <i>Shorea obtusa</i> _Type A                     | 37           | N 12.5779 | E 105.3613 | AB925320             | AB924709             |
| <i>Syzygium syzygioides</i>                      | 38           | N 12.5779 | E 105.3613 | AB925321             | AB924710             |
| <i>Calophyllum calaba</i> var. <i>bracteatum</i> | 39           | N 12.5771 | E 105.3611 | AB925322             | AB924711             |
| <i>Litsea vang</i>                               | 40           | N 12.5771 | E 105.3608 | AB925323             | AB924712             |
| <i>Mangifera cochinchinensis</i>                 | 42           | N 12.5771 | E 105.3607 | AB925324             | AB924713             |
| <i>Walsura robusta</i>                           | 43           | N 12.5771 | E 105.3605 | AB925325             | AB924714             |
| <i>Aglaiia elaeagnoidea</i>                      | 44           | N 12.5771 | E 105.3605 | AB925326             | AB924715             |
| <i>Glycosmis macrophylla</i>                     | 45           | N 12.5771 | E 105.3604 | AB925327             | AB924716             |
| <i>Cratoxylum formosum</i>                       | 46           | N 12.5771 | E 105.3604 | AB925328             | AB924717             |
| <i>Sindora siamensis</i>                         | 47           | N 12.5772 | E 105.3604 | AB925329             | AB924718             |
| <i>Garcinia oliveri</i>                          | 48           | N 12.5774 | E 105.3603 | AB925330             | AB924719             |
| <i>Knema globularia</i>                          | 49           | N 12.5774 | E 105.3604 | AB925331             | AB924720             |
| <i>Clausena excavata</i>                         | 50           | N 12.5778 | E 105.3603 | AB925332             | AB924721             |
| <i>Euonymus cochinchinensis</i>                  | 51           | N 12.5778 | E 105.3603 | AB925333             | AB924722             |
| <i>Dasymaschalon macrocalyx</i>                  | 52           | N 12.5778 | E 105.3603 | AB925334             | AB924723             |
| <i>Melodorum fruticosum</i>                      | 53           | N 12.578  | E 105.3605 | AB925335             | AB924724             |
| <i>Artocarpus chama</i>                          | 54           | N 12.5771 | E 105.3613 | AB925336             | AB924725             |
| <i>Irvingia malayana</i>                         | 55           | N 12.5771 | E 105.3613 | AB925337             | AB924726             |
| <i>Suregada glomerulata</i>                      | 56           | N 12.5772 | E 105.3611 | AB925338             | AB924727             |
| <i>Xerospermum noronhianum</i>                   | 57           | N 12.5772 | E 105.3611 | AB925339             | AB924728             |
| <i>Chaetocarpus castanocarpus</i>                | 58           | N 12.5773 | E 105.3611 | AB925340             | AB924729             |
| <i>Anisoptera costata</i>                        | 59           | N 12.5772 | E 105.3604 | AB925341             | AB924730             |
| <i>Cinnamomum polyadelphum</i>                   | 60           | N 12.5773 | E 105.3605 | AB925342             | AB924731             |
| <i>Adenantha pavonina</i>                        | 61           | N 12.578  | E 105.3604 | AB925343             | AB924732             |
| <i>Crypteronia paniculata</i>                    | 63           | N 12.5779 | E 105.3603 | AB925344             | AB924733             |
| <i>Syzygium syzygioides</i>                      | 64           | N 12.5779 | E 105.3611 | AB925345             | AB924734             |
| <i>Garcinia oliveri</i>                          | 65           | N 12.5779 | E 105.3611 | AB925346             | -                    |
| <i>Ardisia crenata</i>                           | 66           | N 12.5769 | E 105.3613 | AB925347             | AB924735             |
| <i>Lagerstroemia duperreana</i>                  | 67           | N 12.5768 | E 105.361  | AB925348             | AB924736             |
| <i>Dialium cochinchinense</i>                    | 68           | N 12.5768 | E 105.361  | AB925349             | AB924737             |
| <i>Walsura robusta</i>                           | 69           | N 12.5776 | E 105.3619 | AB925350             | AB924738             |
| <i>Parinari anamensis</i>                        | 70           | N 12.5935 | E 105.2623 | AB925351             | AB924739             |
| <i>Gardenia coronaria</i> _Type A                | 71           | N 12.5935 | E 105.2623 | AB925352             | AB924740             |
| <i>Gomphia serrata</i>                           | 72           | N 12.5935 | E 105.2623 | AB925353             | AB924741             |
| <i>Diospyros venosa</i>                          | 73           | N 12.5935 | E 105.2623 | AB925354             | AB924742             |

Table S1. continued

| Scientific name                  | Specimen No. | Latitude  | Longitude  | Accession No. (rbcL) | Accession No. (matK) |
|----------------------------------|--------------|-----------|------------|----------------------|----------------------|
| <i>Shorea roxburghii</i>         | 74           | N 12.5935 | E 105.2623 | AB925355             | AB924743             |
| <i>Dipterocarpus intricatus</i>  | 75           | N 12.5935 | E 105.2623 | AB925356             | AB924744             |
| <i>Xylopia pierrei_TypeA</i>     | 76           | N 12.5935 | E 105.2623 | AB925357             | AB924745             |
| <i>Xylopia vielana</i>           | 77           | N 12.5935 | E 105.2623 | AB925358             | AB924746             |
| <i>Syzygium zeylanicum</i>       | 78           | N 12.5935 | E 105.2623 | AB925359             | AB924747             |
| <i>Careya arborea</i>            | 79           | N 12.5935 | E 105.2623 | -                    | AB924748             |
| <i>Croton columnaris</i>         | 80           | N 12.5935 | E 105.2623 | AB925360             | AB924749             |
| <i>Eurycoma longifolia</i>       | 81           | N 12.5935 | E 105.2623 | AB925361             | AB924750             |
| <i>Peltophorum dasyrrhachis</i>  | 82           | N 12.5935 | E 105.2623 | AB925362             | AB924751             |
| <i>Dillenia indica_Type A</i>    | 83           | N 12.5935 | E 105.2623 | AB925363             | AB924752             |
| <i>Dalbergia cochinchinensis</i> | 85           | N 12.5935 | E 105.2623 | AB925364             | AB924753             |
| <i>Tetracera loureiri</i>        | 86           | N 12.5935 | E 105.2623 | AB925365             | AB924754             |
| <i>Ixora cibdela</i>             | 87           | N 12.5935 | E 105.2623 | AB925366             | AB924755             |
| <i>Trema orientalis</i>          | 88           | N 12.5935 | E 105.2623 | AB925367             | AB924756             |
| <i>Memecylon edule</i>           | 89           | N 12.5935 | E 105.2623 | AB925368             | AB924757             |
| <i>Memecylon chevalieri</i>      | 90           | N 12.5935 | E 105.2623 | AB925369             | AB924758             |
| <i>Syzygium oblatum</i>          | 91           | N 12.5935 | E 105.2623 | AB925370             | AB924759             |
| <i>Anisoptera costata</i>        | 92           | N 12.5938 | E 105.2626 | AB925371             | AB924760             |
| <i>Rhodomyrtus tomentosa</i>     | 93           | N 12.5938 | E 105.2629 | AB925372             | AB924761             |
| <i>Symplocos acuminata</i>       | 94           | N 12.5938 | E 105.2629 | AB925373             | AB924762             |
| <i>Gardenia coronaria_Type A</i> | 95           | N 12.5938 | E 105.2629 | AB925374             | AB924763             |
| <i>Khaya senegalensis</i>        | 96           | N 12.5765 | E 105.3908 | AB925375             | AB924764             |
| <i>Hopea odorata</i>             | 97           | N 12.5764 | E 105.3906 | AB925376             | AB924765             |
| <i>Mussaenda</i> sp. FU-98       | 98           | N 12.5765 | E 105.3897 | AB925377             | AB924766             |
| <i>Calamus tetradactylus</i>     | 99           | N 12.5761 | E 105.3897 | AB925378             | AB924767             |
| <i>Vatica odorata</i>            | 100          | N 12.5759 | E 105.3899 | AB925379             | AB924768             |
| <i>Dracaena angustifolia</i>     | 101          | N 12.576  | E 105.39   | AB925380             | AB924769             |
| <i>Lasianthus hirsutus</i>       | 102          | N 12.5759 | E 105.3904 | AB925381             | AB924770             |
| <i>Syzygium syzygioides</i>      | 103          | N 12.5759 | E 105.3904 | AB925382             | AB924771             |
| <i>Lophopetalum duperreanum</i>  | 104          | N 12.5759 | E 105.3904 | AB925383             | AB924772             |
| <i>Dipterocarpus costatus</i>    | 105          | N 12.576  | E 105.3907 | AB925384             | AB924773             |
| <i>Ochna integerrima_TypeB</i>   | 106          | N 12.576  | E 105.3907 | AB925385             | AB924774             |
| <i>Garcinia hanburyi</i>         | 107          | N 12.576  | E 105.3905 | AB925386             | AB924775             |
| <i>Rourea minor</i>              | 108          | N 12.5759 | E 105.3899 | AB925387             | AB924776             |
| <i>Combretum latifolium</i>      | 109          | N 12.5759 | E 105.3899 | AB925388             | AB924777             |

Table S1. continued

| Scientific name                         | Specimen No. | Latitude  | Longitude  | Accession No. (rbcL) | Accession No. (matK) |
|-----------------------------------------|--------------|-----------|------------|----------------------|----------------------|
| <i>Uvaria wrayi</i>                     | 110          | N 12.5759 | E 105.3899 | AB925389             | AB924778             |
| <i>Smilax megacarpa</i>                 | 111          | N 12.5759 | E 105.3899 | AB925390             | AB924779             |
| <i>Xylopia pierrei_TypeB</i>            | 112          | N 11.9887 | E 104.7409 | AB925391             | AB924780             |
| <i>Rhodammia dumetorum</i>              | 113          | N 11.9887 | E 104.7409 | AB925392             | AB924781             |
| <i>Strophanthus caudatus</i>            | 114          | N 11.9887 | E 104.7409 | AB925393             | AB924782             |
| <i>Connarus cochinchinensis</i>         | 115          | N 11.9887 | E 104.7409 | AB925394             | AB924783             |
| <i>Suregada multiflora</i>              | 116          | N 11.9887 | E 104.7409 | AB925395             | AB924784             |
| <i>Cratoxylum formosum</i>              | 117          | N 11.9887 | E 104.7409 | AB925396             | AB924785             |
| <i>Olex wightiana</i>                   | 118          | N 11.9888 | E 104.741  | AB925397             | AB924786             |
| <i>Dendrophthoe pentandra</i>           | 119          | N 11.9889 | E 104.7411 | AB925398             | AB924787             |
| <i>Memecylon scutellatum</i>            | 120          | N 11.9889 | E 104.7411 | AB925399             | AB924788             |
| <i>Lepisanthes tetraphylla</i>          | 121          | N 11.9889 | E 104.7411 | AB925400             | AB924789             |
| <i>Ochna integerrima_TypeB</i>          | 122          | N 11.9889 | E 104.7411 | AB925401             | AB924790             |
| <i>Eurycoma longifolia</i>              | 123          | N 11.9889 | E 104.7411 | AB925402             | AB924791             |
| <i>Connarus cochinchinensis</i>         | 124          | N 11.9888 | E 104.7412 | AB925403             | AB924792             |
| <i>Scleropyrum pentandrum_Type A</i>    | 125          | N 11.9889 | E 104.7413 | AB925404             | AB924793             |
| <i>Shorea siamensis</i>                 | 126          | N 11.9889 | E 104.7413 | AB925405             | AB924794             |
| <i>Aporosa villosa</i>                  | 127          | N 11.9889 | E 104.7413 | AB925406             | AB924795             |
| <i>Litsea glutinosa</i>                 | 128          | N 11.9889 | E 104.7413 | AB925407             | AB924796             |
| <i>Atalantia monophylla</i>             | 129          | N 11.9889 | E 104.7414 | AB925408             | AB924797             |
| <i>Carallia brachiata_Type A</i>        | 131          | N 11.9889 | E 104.7414 | AB925409             | AB924798             |
| <i>Prismatomeris filamentosa_Type A</i> | 132          | N 11.9889 | E 104.7414 | AB925410             | AB924799             |
| <i>Diospyros pilosanthera_Type A</i>    | 133          | N 11.9888 | E 104.7414 | AB925411             | AB924800             |
| <i>Ziziphus cambodianus</i>             | 134          | N 11.9888 | E 104.7412 | AB925412             | AB924801             |
| <i>Microcos tomentosa</i>               | 136          | N 11.9886 | E 104.7412 | AB925413             | AB924802             |
| <i>Strychnos nux-vomica</i>             | 137          | N 11.9888 | E 104.7409 | AB925414             | AB924803             |
| <i>Tetracera loureiri</i>               | 138          | N 11.9887 | E 104.741  | AB925415             | AB924804             |
| <i>Phyllanthus emblica</i>              | 139          | N 11.9881 | E 104.7409 | AB925416             | AB924805             |
| <i>Parinari anamensis</i>               | 140          | N 11.988  | E 104.7409 | AB925417             | AB924806             |
| <i>Careya arborea</i>                   | 142          | N 11.9878 | E 104.741  | AB925418             | AB924807             |
| <i>Xylia xylocarpa var. kerrii</i>      | 143          | N 11.9878 | E 104.741  | AB925419             | AB924808             |
| <i>Buchanania reticulata</i>            | 144          | N 11.9876 | E 104.741  | AB925420             | AB924809             |
| <i>Artabotrys sp. FU-145</i>            | 145          | N 11.9876 | E 104.741  | AB925421             | AB924810             |
| <i>Gluta laccifera_Type A</i>           | 146          | N 11.9873 | E 104.7408 | AB925422             | AB924811             |
| <i>Uvaria rufa</i>                      | 147          | N 11.9872 | E 104.7406 | AB925423             | AB924812             |

Table S1. continued

| Scientific name                                  | Specimen No. | Latitude  | Longitude  | Accession No. (rbcL) | Accession No. (matK) |
|--------------------------------------------------|--------------|-----------|------------|----------------------|----------------------|
| <i>Pterocarpus macrocarpus</i>                   | 148          | N 11.9872 | E 104.7405 | AB925424             | AB924813             |
| <i>Diospyros ehretioides</i>                     | 149          | N 11.9874 | E 104.7403 | AB925425             | AB924814             |
| <i>Melastoma saigonense</i>                      | 150          | N 11.9878 | E 104.7401 | AB925426             | AB924815             |
| <i>Catunaregam tomentosa</i>                     | 151          | N 11.9878 | E 104.7401 | AB925427             | AB924816             |
| <i>Vitex peduncularis</i>                        | 153          | N 11.9889 | E 104.7408 | AB925428             | AB924817             |
| <i>Polyalthia evecta</i>                         | 154          | N 11.9891 | E 104.7409 | AB925429             | AB924818             |
| <i>Irvingia malayana</i>                         | 156          | N 11.9891 | E 104.741  | AB925430             | AB924819             |
| <i>Artocarpus nitidus</i>                        | 157          | N 11.9891 | E 104.741  | AB925431             | AB924820             |
| <i>Antidesma ghaesembilla</i>                    | 158          | N 11.9898 | E 104.7418 | AB925432             | AB924821             |
| <i>Calamus</i> sp. FU-159                        | 159          | N 11.9901 | E 104.7417 | AB925433             | AB924822             |
| <i>Garcinia harmandii</i>                        | 160          | N 11.9901 | E 104.7417 | AB925434             | AB924823             |
| <i>Flacourtia indica</i>                         | 161          | N 11.9901 | E 104.7417 | AB925435             | -                    |
| <i>Oxyceros horridus</i>                         | 162          | N 11.9905 | E 104.7409 | AB925436             | AB924824             |
| <i>Beilschmiedia roxburghiana</i>                | 163          | N 11.9905 | E 104.7409 | AB925437             | AB924825             |
| <i>Dalbergia nigrescens</i>                      | 164          | N 11.9906 | E 104.7409 | AB925438             | AB924826             |
| <i>Gardenia sootepensis</i>                      | 165          | N 11.9905 | E 104.7408 | AB925439             | AB924827             |
| <i>Dalbergia velutina</i>                        | 166          | N 11.9913 | E 104.7407 | AB925440             | AB924828             |
| <i>Buchanania reticulata</i>                     | 167          | N 11.9915 | E 104.7408 | AB925441             | AB924829             |
| <i>Ixora javanica</i>                            | 168          | N 11.9889 | E 104.7409 | AB925442             | AB924830             |
| <i>Calophyllum calaba</i> var. <i>bracteatum</i> | 169          | N 11.9892 | E 104.7413 | AB925443             | AB924831             |
| <i>Amphineurion marginatum</i> _Type A           | 171          | N 11.9921 | E 104.7409 | AB925444             | AB924832             |
| <i>Dipterocarpus intricatus</i>                  | 172          | N 11.9921 | E 104.7409 | AB925445             | AB924833             |
| <i>Spatholobus parviflorus</i>                   | 173          | N 11.9921 | E 104.7409 | AB925446             | AB924834             |
| <i>Bombax anceps</i>                             | 174          | N 11.9922 | E 104.7406 | AB925447             | AB924835             |
| <i>Chukrasia tabularis</i>                       | 175          | N 11.9922 | E 104.7406 | AB925448             | AB924836             |
| <i>Streblus asper</i>                            | 176          | N 11.9919 | E 104.7408 | AB925449             | AB924837             |
| <i>Brucea javanica</i>                           | 177          | N 11.9917 | E 104.7427 | AB925450             | -                    |
| <i>Limnophila</i> sp. FU-178                     | 178          | N 11.9916 | E 104.7427 | AB925451             | -                    |
| <i>Shorea obtuse</i> _Type B                     | 179          | N 11.987  | E 104.7429 | AB925452             | AB924838             |
| <i>Dipterocarpus obtusifolius</i>                | 180          | N 11.987  | E 104.7429 | AB925453             | AB924839             |
| <i>Knema globularia</i>                          | 181          | N 11.9871 | E 104.7433 | AB925454             | AB924840             |
| <i>Peltophorum dasyrrhachis</i>                  | 182          | N 11.9883 | E 104.7449 | AB925455             | AB924841             |
| <i>Pterocarpus macrocarpus</i>                   | 183          | N 11.9883 | E 104.7449 | AB925456             | AB924842             |
| <i>Dillenia aurea</i>                            | 184          | N 11.9891 | E 104.7466 | AB925457             | AB924843             |
| <i>Canarium subulatum</i>                        | 185          | N 11.9891 | E 104.7466 | AB925458             | AB924844             |

Table S1. continued

| Scientific name                       | Specimen No. | Latitude  | Longitude  | Accession No. (rbcL) | Accession No. (matK) |
|---------------------------------------|--------------|-----------|------------|----------------------|----------------------|
| <i>Terminalia chebula</i>             | 186          | N 11.989  | E 104.746  | AB925459             | AB924845             |
| <i>Bambusa</i> sp. FU-187             | 187          | N 11.9905 | E 104.7446 | AB925460             | AB924846             |
| <i>Terminalia calamansanay</i>        | 188          | N 11.9909 | E 104.7446 | AB925461             | AB924847             |
| <i>Buchanania reticulata</i>          | 189          | N 11.9909 | E 104.7446 | AB925462             | AB924848             |
| <i>Breynia vitis-idaea</i>            | 190          | N 11.9909 | E 104.7446 | AB925463             | AB924849             |
| <i>Lagerstroemia floribunda</i>       | 191          | N 11.9916 | E 104.743  | AB925464             | AB924850             |
| <i>Dipterocarpus intricatus</i>       | 192          | N 11.9899 | E 104.7423 | AB925465             | AB924851             |
| <i>Gluta laccifera</i> _Type A        | 193          | N 11.9888 | E 104.7409 | AB925466             | AB924852             |
| <i>Gmelina asiatica</i>               | 194          | N 11.9889 | E 104.7414 | AB925467             | AB924853             |
| <i>Acacia</i> sp. FU-195              | 195          | N 11.9833 | E 104.7333 | AB925468             | AB924854             |
| <i>Dipterocarpus intricatus</i>       | 197          | N 11.9886 | E 104.7411 | AB925469             | AB924855             |
| <i>Eucalyptus</i> sp. FU-200          | 200          | N 11.9889 | E 104.7413 | AB925470             | AB924856             |
| <i>Syzygium cumini</i>                | 202          | N 11.9888 | E 104.7409 | AB925471             | AB924857             |
| <i>Xylopi</i> a <i>pierrei</i> _TypeA | 203          | N 11.9888 | E 104.7409 | AB925472             | AB924858             |
| <i>Dalbergia nigrescens</i>           | 205          | N 11.9891 | E 104.741  | AB925473             | -                    |
| <i>Mangifera duperreana</i>           | 209          | N 11.9891 | E 104.7411 | AB925474             | AB924859             |
| <i>Pterocarpus macrocarpus</i>        | 210          | N 11.9888 | E 104.7408 | AB925475             | AB924860             |
| <i>Xylopi</i> a <i>pierrei</i> _TypeA | 214          | N 11.989  | E 104.7411 | AB925476             | AB924861             |
| <i>Carallia brachiata</i> _Type A     | 215          | N 11.9891 | E 104.7411 | AB925477             | AB924862             |
| <i>Gardenia coronaria</i> _Type A     | 217          | N 11.989  | E 104.7409 | AB925478             | AB924863             |
| <i>Shorea siamensis</i>               | 220          | N 11.9833 | E 104.7333 | AB925479             | AB924864             |
| <i>Lannea coromandelica</i>           | 221          | N 11.9905 | E 104.7409 | AB925480             | AB924865             |
| <i>Chukrasia tabularis</i>            | 222          | N 11.9906 | E 104.7408 | AB925481             | AB924866             |
| <i>Aglai</i> a <i>elaegnoidea</i>     | 226          | N 12.5771 | E 105.3915 | AB925482             | AB924867             |
| <i>Knema globularia</i>               | 228          | N 12.5771 | E 105.3914 | AB925483             | AB924868             |
| <i>Castanopsis piriformis</i>         | 230          | N 12.5768 | E 105.3915 | AB925484             | AB924869             |
| <i>Syzygium grande</i>                | 233          | N 12.5759 | E 105.3873 | AB925485             | AB924870             |
| <i>Microcos tomentosa</i>             | 234          | N 12.5758 | E 105.3873 | AB925486             | AB924871             |
| <i>Nephelium hypoleucum</i>           | 237          | N 12.5756 | E 105.3872 | AB925487             | AB924872             |
| <i>Xanthophyllum colubrinum</i>       | 238          | N 12.5755 | E 105.3872 | AB925488             | -                    |
| <i>Dipterocarpus costatus</i>         | 239          | N 12.5755 | E 105.3872 | AB925489             | -                    |
| <i>Melodorum fruticosum</i>           | 241          | N 12.5753 | E 105.3871 | AB925490             | AB924873             |
| <i>Ardisia helferiana</i>             | 243          | N 12.5752 | E 105.3871 | AB925491             | AB924874             |
| <i>Vitex pinnata</i> _Type A          | 244          | N 12.5749 | E 105.387  | AB925492             | AB924875             |
| <i>Carallia brachiata</i> _TypeB      | 245          | N 12.5752 | E 105.3871 | AB925493             | AB924876             |

Table S1. continued

| Scientific name                                    | Specimen No. | Latitude  | Longitude  | Accession No. (rbcL) | Accession No. (matK) |
|----------------------------------------------------|--------------|-----------|------------|----------------------|----------------------|
| <i>Diospyros undulata</i> var. <i>cratericalyx</i> | 246          | N 12.5744 | E 105.387  | AB925494             | -                    |
| <i>Madhuca kompongsonensis</i>                     | 247          | N 12.5744 | E 105.3871 | AB925495             | AB924877             |
| <i>Memecylon edule</i>                             | 248          | N 12.5742 | E 105.3872 | AB925496             | AB924878             |
| <i>Argyreia obtecta</i>                            | 249          | N 12.5742 | E 105.3872 | AB925497             | AB924879             |
| <i>Chonemorpha fragrans</i>                        | 250          | N 12.5742 | E 105.3872 | AB925498             | AB924880             |
| <i>Amphineurion marginatum</i> _Type A             | 251          | N 12.5742 | E 105.3871 | AB925499             | AB924881             |
| <i>Dioscorea oryzetorum</i>                        | 252          | N 12.5741 | E 105.3871 | AB925500             | AB924882             |
| <i>Garcinia oliveri</i>                            | 253          | N 12.5749 | E 105.3872 | AB925501             | AB924883             |
| <i>Ternstroemia wallichiana</i>                    | 254          | N 12.5758 | E 105.3903 | AB925502             | AB924884             |
| <i>Clerodendrum schmidtii</i>                      | 256          | N 12.5759 | E 105.3904 | AB925503             | -                    |
| <i>Ixora javanica</i>                              | 257          | N 12.576  | E 105.3906 | AB925504             | AB924885             |
| <i>Strychnos minor</i> var. <i>thorelii</i>        | 258          | N 12.5762 | E 105.3904 | AB925505             | AB924886             |
| <i>Psychotria asiatica</i>                         | 259          | N 12.5761 | E 105.3904 | AB925506             | AB924887             |
| <i>Memecylon caeruleum</i>                         | 260          | N 12.576  | E 105.3896 | AB925507             | AB924888             |
| <i>Pavetta indica</i>                              | 261          | N 12.5759 | E 105.3896 | AB925508             | AB924889             |
| <i>Acronychia pedunculata</i>                      | 263          | N 12.5759 | E 105.3896 | AB925509             | -                    |
| <i>Strychnos minor</i> var. <i>thorelii</i>        | 264          | N 12.5756 | E 105.3895 | AB925510             | AB924890             |
| <i>Suregada glomerulata</i>                        | 265          | N 12.5756 | E 105.3896 | AB925511             | -                    |
| <i>Dasymaschalon macrocalyx</i>                    | 267          | N 12.5754 | E 105.3896 | AB925512             | AB924891             |
| <i>Cleistanthus sumatranus</i>                     | 268          | N 12.5752 | E 105.3896 | AB925513             | AB924892             |
| <i>Antidesma japonicum</i>                         | 269          | N 12.5752 | E 105.3895 | AB925514             | AB924893             |
| <i>Dillenia indica</i> _Type B                     | 270          | N 12.575  | E 105.3894 | AB925515             | AB924894             |
| <i>Xerospermum noronhianum</i>                     | 272          | N 12.5758 | E 105.3896 | AB925516             | AB924895             |
| <i>Chrysophyllum roxburghii</i>                    | 273          | N 12.5758 | E 105.3896 | AB925517             | AB924896             |
| <i>Psydrax pergracilis</i>                         | 274          | N 12.5758 | E 105.3898 | AB925518             | AB924897             |
| <i>Cleistanthus sumatranus</i>                     | 275          | N 12.575  | E 105.3896 | AB925519             | AB924898             |
| <i>Cleistanthus sumatranus</i>                     | 276          | N 12.5751 | E 105.3896 | AB925520             | AB924899             |
| <i>Elaeocarpus stipularis</i>                      | 279          | N 12.5754 | E 105.3898 | AB925521             | AB924900             |
| <i>Lophopetalum duperreanum</i>                    | 280          | N 12.5749 | E 105.3897 | AB925522             | AB924901             |
| <i>Shorea guiso</i>                                | 281          | N 12.5754 | E 105.3899 | AB925523             | AB924902             |
| <i>Dipterocarpus costatus</i>                      | 283          | N 12.575  | E 105.3896 | AB925524             | AB924903             |
| <i>Ternstroemia wallichiana</i>                    | 284          | N 12.5751 | E 105.3904 | AB925525             | -                    |
| <i>Chionanthus microstigma</i>                     | 288          | N 12.5759 | E 105.3904 | AB925526             | AB924904             |
| <i>Aglaia lawii</i>                                | 289          | N 12.576  | E 105.3906 | AB925527             | AB924905             |
| <i>Uvaria cordata</i>                              | 290          | N 12.5761 | E 105.3906 | AB925528             | AB924906             |

Table S1. continued

| Scientific name                                   | Specimen No. | Latitude  | Longitude  | Accession No. (rbcL) | Accession No. (matK) |
|---------------------------------------------------|--------------|-----------|------------|----------------------|----------------------|
| <i>Hopea recopei</i>                              | 291          | N 12.5761 | E 105.3907 | AB925529             | AB924907             |
| <i>Aglaiia elaeagnoidea</i>                       | 292          | N 12.5759 | E 105.3904 | AB925530             | AB924908             |
| <i>Morinda coreia</i>                             | 294          | N 12.5738 | E 105.3451 | AB925531             | AB924909             |
| <i>Ziziphus oenopolia</i>                         | 295          | N 12.5738 | E 105.3451 | AB925532             | AB924910             |
| <i>Diospyros filipendula</i>                      | 297          | N 12.5739 | E 105.345  | AB925533             | AB924911             |
| <i>Dimocarpus longan</i> subsp. <i>malesianus</i> | 298          | N 12.5739 | E 105.3449 | AB925534             | AB924912             |
| <i>Croton poilanei</i>                            | 299          | N 12.5739 | E 105.3449 | AB925535             | AB924913             |
| <i>Pterospermum lanceifolium</i>                  | 300          | N 12.5745 | E 105.3448 | AB925536             | AB924914             |
| <i>Aporosa planchoniana</i>                       | 301          | N 12.5746 | E 105.3446 | AB925537             | AB924915             |
| <i>Tetradium glabrifolium</i>                     | 302          | N 12.5749 | E 105.3444 | AB925538             | AB924916             |
| <i>Ficus hirta</i>                                | 303          | N 12.5755 | E 105.344  | AB925539             | AB924917             |
| <i>Uvaria fauveliana</i>                          | 304          | N 12.5755 | E 105.344  | AB925540             | AB924918             |
| <i>Garcinia loureiroi</i>                         | 305          | N 12.5755 | E 105.344  | AB925541             | AB924919             |
| <i>Terminalia nigrovenulosa</i>                   | 306          | N 12.5731 | E 105.3439 | AB925542             | AB924920             |
| <i>Trichosanthes pedata</i>                       | 307          | N 12.5724 | E 105.3429 | AB925543             | AB924921             |
| <i>Tetracera indica</i>                           | 308          | N 12.5723 | E 105.3429 | AB925544             | AB924922             |
| <i>Uvaria micrantha</i>                           | 309          | N 12.5697 | E 105.3366 | AB925545             | AB924923             |
| <i>Goniothalamus tamirensis</i>                   | 310          | N 12.5697 | E 105.3366 | AB925546             | AB924924             |
| <i>Acronychia pedunculata</i>                     | 311          | N 12.5695 | E 105.3341 | AB925547             | AB924925             |
| <i>Syzygium zeylanicum</i>                        | 313          | N 12.5698 | E 105.3336 | AB925548             | AB924926             |
| <i>Aporosa planchoniana</i>                       | 315          | N 12.5772 | E 105.3611 | AB925549             | AB924927             |
| <i>Dehaasia cuneata</i> var. <i>longifolia</i>    | 316          | N 12.5772 | E 105.3612 | AB925550             | AB924928             |
| <i>Nephelium hypoleucum</i>                       | 317          | N 12.5772 | E 105.3612 | AB925551             | AB924929             |
| <i>Sterculia stigmatota</i>                       | 321          | N 12.5772 | E 105.3603 | AB925552             | AB924930             |
| <i>Nephelium hypoleucum</i>                       | 322          | N 12.5773 | E 105.3604 | AB925553             | AB924931             |
| <i>Aglaiia elaeagnoidea</i>                       | 323          | N 12.5773 | E 105.3605 | AB925554             | AB924932             |
| <i>Cinnamomum polyadelphum</i>                    | 325          | N 12.5773 | E 105.3604 | AB925555             | AB924933             |
| <i>Phoebe lanceolata</i>                          | 326          | N 12.5771 | E 105.3605 | AB925556             | AB924934             |
| <i>Chrysophyllum roxburghii</i>                   | 328          | N 12.5772 | E 105.3606 | AB925557             | AB924935             |
| <i>Parameria laevigata</i>                        | 331          | N 12.5772 | E 105.3605 | AB925558             | AB924936             |
| <i>Cleistanthus sumatranus</i>                    | 332          | N 12.5771 | E 105.3603 | AB925559             | AB924937             |
| <i>Aporosa planchoniana</i>                       | 333          | N 12.5772 | E 105.3603 | AB925560             | AB924938             |
| <i>Xerospermum noronhianum</i>                    | 336          | N 12.5779 | E 105.3603 | AB925561             | AB924939             |
| <i>Aglaiia elaeagnoidea</i>                       | 338          | N 12.5773 | E 105.3617 | AB925562             | AB924940             |
| <i>Xerospermum noronhianum</i>                    | 341          | N 12.5774 | E 105.3619 | AB925563             | AB924941             |



Table S1. continued

| Scientific name                                  | Specimen No. | Latitude  | Longitude  | Accession No. (rbcL) | Accession No. (matK) |
|--------------------------------------------------|--------------|-----------|------------|----------------------|----------------------|
| <i>Psydrax pergracilis</i>                       | 342          | N 12.5774 | E 105.3619 | AB925564             | AB924942             |
| <i>Cleistanthus sumatranus</i>                   | 343          | N 12.5774 | E 105.362  | AB925565             | AB924943             |
| <i>Aporosa planchoniana</i>                      | 344          | N 12.5775 | E 105.3621 | AB925566             | AB924944             |
| <i>Cleistanthus sumatranus</i>                   | 345          | N 12.5779 | E 105.3621 | AB925567             | AB924945             |
| <i>Murraya koenigii</i>                          | 346          | N 12.5779 | E 105.3621 | AB925568             | AB924946             |
| <i>Syzygium syzygioides</i>                      | 348          | N 12.5787 | E 105.3625 | AB925569             | AB924947             |
| <i>Chionanthus thorelii</i>                      | 349          | N 12.5792 | E 105.3623 | AB925570             | AB924948             |
| <i>Phoebe lanceolata</i>                         | 350          | N 12.5794 | E 105.3622 | AB925571             | -                    |
| <i>Mallotus paniculatus</i>                      | 351          | N 12.5794 | E 105.362  | AB925572             | AB924949             |
| <i>Xanthophyllum colubrinum</i>                  | 352          | N 12.5799 | E 105.3621 | AB925573             | -                    |
| <i>Ellipanthus tomentosus</i>                    | 353          | N 12.5802 | E 105.3623 | AB925574             | AB924950             |
| <i>Tetradium glabrifolium</i>                    | 355          | N 12.5803 | E 105.3624 | AB925575             | AB924951             |
| <i>Antidesma puncticulatum</i>                   | 356          | N 12.5771 | E 105.3906 | AB925576             | AB924952             |
| <i>Ochna integerrima</i>                         | 358          | N 12.5771 | E 105.3906 | AB925577             | -                    |
| <i>Vitex pinnata</i> _Type B                     | 360          | N 12.5778 | E 105.3906 | AB925578             | AB924953             |
| <i>Dillenia ovata</i>                            | 362          | N 12.6335 | E 105.2734 | AB925579             | AB924954             |
| <i>Lagerstroemia duperreana</i>                  | 364          | N 12.6335 | E 105.2733 | AB925580             | AB924955             |
| <i>Prismatomeris sessiliflora</i> _Type A        | 371          | N 12.6335 | E 105.2728 | AB925581             | AB924956             |
| <i>Goniothalamus tamirensis</i>                  | 372          | N 12.6335 | E 105.2728 | AB925582             | AB924957             |
| <i>Xylopi pierrei</i> _Type A                    | 374          | N 12.6336 | E 105.2727 | AB925583             | AB924958             |
| <i>Xylopi vielana</i>                            | 375          | N 12.6336 | E 105.2728 | AB925584             | AB924959             |
| <i>Terminalia nigrovenulosa</i>                  | 376          | N 12.6337 | E 105.2726 | AB925585             | AB924960             |
| <i>Syzygium cumini</i>                           | 377          | N 12.6337 | E 105.2724 | AB925586             | AB924961             |
| <i>Madhuca kompongsonensis</i>                   | 378          | N 12.6337 | E 105.2725 | AB925587             | AB924962             |
| <i>Lithocarpus harmandii</i>                     | 379          | N 12.6338 | E 105.2725 | AB925588             | AB924963             |
| <i>Dipterocarpus alatus</i>                      | 383          | N 12.5903 | E 105.2696 | AB925589             | AB924964             |
| <i>Pterocarpus macrocarpus</i>                   | 384          | N 12.5905 | E 105.2694 | AB925590             | -                    |
| <i>Chaetocarpus castanocarpus</i>                | 385          | -         | -          | AB925591             | AB924965             |
| <i>Colubrina javanica</i>                        | 386          | -         | -          | AB925592             | AB924966             |
| <i>Combretum</i> sp. FU-388                      | 388          | -         | -          | AB925593             | AB924967             |
| <i>Connarus cochinchinensis</i>                  | 390          | N 12.634  | E 105.2747 | AB925594             | AB924968             |
| <i>Phyllodium vestitum</i>                       | 391          | N 12.6339 | E 105.2747 | AB925595             | AB924969             |
| <i>Calophyllum calaba</i> var. <i>bracteatum</i> | 392          | N 12.6336 | E 105.2724 | AB925596             | AB924970             |
| <i>Euonymus cochinchinensis</i>                  | 393          | N 12.6336 | E 105.2724 | AB925597             | AB924971             |
| <i>Cratoxylum cochinchinense</i>                 | 394          | N 12.6336 | E 105.272  | AB925598             | AB924972             |

Table S1. continued

| Scientific name                      | Specimen No. | Latitude  | Longitude  | Accession No. (rbcL) | Accession No. (matK) |
|--------------------------------------|--------------|-----------|------------|----------------------|----------------------|
| <i>Cratoxylum formosum</i>           | 395          | N 12.6336 | E 105.272  | AB925599             | AB924973             |
| <i>Psychotria adenophylla</i>        | 398          | N 12.6336 | E 105.2717 | AB925600             | AB924974             |
| <i>Dendrolobium lanceolatum</i>      | 399          | N 12.6333 | E 105.2717 | AB925601             | AB924975             |
| <i>Strychnos rupicola</i>            | 403          | N 12.6337 | E 105.2704 | AB925602             | AB924976             |
| <i>Hegnera obcordata</i>             | 404          | N 12.6335 | E 105.27   | AB925603             | AB924977             |
| <i>Colona auriculata</i>             | 405          | N 12.6337 | E 105.2695 | AB925604             | AB924978             |
| <i>Tadehagi godefroyanum</i>         | 410          | N 12.6335 | E 105.2691 | AB925605             | AB924979             |
| <i>Chionanthus ramiflorus</i>        | 411          | N 12.6336 | E 105.269  | AB925606             | AB924980             |
| <i>Tristaniopsis burmanica</i>       | 414          | N 12.6335 | E 105.2691 | AB925607             | AB924981             |
| <i>Pinus merkusii</i>                | 415          | N 12.6331 | E 105.2689 | AB925608             | AB924982             |
| <i>Wikstroemia polyantha</i>         | 416          | N 12.6331 | E 105.269  | AB925609             | AB924983             |
| <i>Diospyros pilosanthera_Type B</i> | 420          | N 12.6336 | E 105.2731 | AB925610             | AB924984             |
| <i>Helicteres hirsuta</i>            | 421          | N 12.6164 | E 105.2693 | AB925611             | AB924985             |
| <i>Diospyros ehretioides</i>         | 424          | N 12.6163 | E 105.2686 | AB925612             | AB924986             |
| <i>Pueraria phaseoloides</i>         | 426          | N 12.6163 | E 105.2685 | AB925613             | AB924987             |
| <i>Erythroxylum cambodianum</i>      | 427          | N 12.6163 | E 105.2685 | AB925614             | AB924988             |
| <i>Smilax cambodiana</i>             | 428          | N 12.6163 | E 105.2677 | AB925615             | AB924989             |
| <i>Albizia corniculata</i>           | 429          | N 12.6162 | E 105.2658 | AB925616             | AB924990             |
| <i>Memecylon edule</i>               | 430          | N 12.6162 | E 105.2658 | AB925617             | -                    |
| <i>Memecylon scutellatum</i>         | 431          | N 12.6162 | E 105.2658 | AB925618             | AB924991             |
| <i>Streptocaulon juventas</i>        | 433          | N 12.6162 | E 105.2654 | AB925619             | -                    |
| <i>Melaleuca cajuputi</i>            | 435          | N 12.6161 | E 105.2632 | AB925620             | AB924992             |
| <i>Dillenia hookeri</i>              | 437          | N 12.6161 | E 105.263  | AB925621             | AB924993             |
| <i>Calamus salicifolius</i>          | 441          | N 12.6167 | E 105.2639 | AB925622             | AB924994             |
| <i>Psychotria asiatica</i>           | 442          | N 12.6162 | E 105.2658 | AB925623             | AB924995             |
| <i>Cleistanthus tomentosus</i>       | 443          | N 12.6162 | E 105.2654 | AB925624             | AB924996             |
| <i>Xanthophyllum flavescens</i>      | 444          | N 12.6161 | E 105.2639 | AB925625             | AB924997             |
| <i>Garcinia lanessanii</i>           | 447          | N 12.9724 | E 105.4204 | AB925626             | AB924998             |
| <i>Tarenna hoaensis</i>              | 448          | N 12.9724 | E 105.4204 | AB925627             | AB924999             |
| <i>Aglaiia lawii</i>                 | 449          | N 12.9714 | E 105.4207 | AB925628             | AB925000             |
| <i>Aglaiia elaeagnoidea</i>          | 452          | N 12.9717 | E 105.4198 | AB925629             | AB925001             |
| <i>Mallotus</i> sp. FU-454           | 454          | N 12.9718 | E 105.4197 | AB925630             | AB925002             |
| <i>Aporosa</i> sp. FU-455            | 455          | N 12.9718 | E 105.4197 | AB925631             | AB925003             |
| <i>Xerospermum noronhianum</i>       | 456          | N 12.9718 | E 105.4197 | AB925632             | AB925004             |
| <i>Combretum latifolium</i>          | 457          | N 12.9718 | E 105.4197 | AB925633             | AB925005             |

Table S1. continued

| Scientific name                                          | Specimen No. | Latitude  | Longitude  | Accession No. (rbcL) | Accession No. (matK) |
|----------------------------------------------------------|--------------|-----------|------------|----------------------|----------------------|
| <i>Cinnamomum polyadelfum</i>                            | 459          | N 12.9718 | E 105.4197 | AB925634             | AB925006             |
| <i>Syzygium cumini</i>                                   | 460          | N 12.9718 | E 105.4197 | AB925635             | AB925007             |
| <i>Sterculia hymenocalyx</i>                             | 461          | N 12.9718 | E 105.4197 | AB925636             | AB925008             |
| <i>Terminalia darfeuilleana</i>                          | 463          | N 12.9718 | E 105.4197 | AB925637             | AB925009             |
| <i>Sandoricum koetjape</i>                               | 464          | N 12.9718 | E 105.4197 | AB925638             | AB925010             |
| <i>Chionanthus mala-elengi</i> subsp. <i>terniflorus</i> | 467          | N 12.9718 | E 105.4197 | AB925639             | AB925011             |
| <i>Aglaia lawii</i>                                      | 469          | N 12.9718 | E 105.4197 | AB925640             | AB925012             |
| <i>Antidesma puncticulatum</i>                           | 471          | N 12.9718 | E 105.4197 | AB925641             | AB925013             |
| <i>Goniothalamus tamirensis</i>                          | 472          | N 12.9718 | E 105.4197 | AB925642             | AB925014             |
| <i>Nephelium hypoleucum</i>                              | 473          | N 12.9718 | E 105.4197 | AB925643             | AB925015             |
| <i>Sterculia hymenocalyx</i>                             | 474          | N 12.9718 | E 105.4197 | AB925644             | AB925016             |
| <i>Syzygium cumini</i>                                   | 475          | N 12.9718 | E 105.4197 | AB925645             | AB925017             |
| <i>Aporosa planchoniana</i>                              | 476          | N 12.9718 | E 105.4197 | AB925646             | AB925018             |
| <i>Microdesmis caseariifolia</i>                         | 477          | N 12.9718 | E 105.4197 | AB925647             | AB925019             |
| <i>Mallotus</i> sp. FU-478                               | 478          | N 12.9718 | E 105.4197 | AB925648             | AB925020             |
| <i>Sterculia hymenocalyx</i>                             | 479          | N 12.9718 | E 105.4197 | AB925649             | AB925021             |
| <i>Capparis micracantha</i>                              | 481          | N 12.9731 | E 105.4213 | AB925650             | AB925022             |
| <i>Prismatomeris sessiliflora</i> _Type B                | 482          | N 12.9731 | E 105.4213 | AB925651             | AB925023             |
| <i>Shorea henryana</i>                                   | 483          | N 12.9728 | E 105.4212 | AB925652             | AB925024             |
| <i>Fagraea fragrans</i>                                  | 484          | N 12.9839 | E 105.4171 | AB925653             | AB925025             |
| <i>Rinorea anguifera</i>                                 | 485          | N 12.9949 | E 105.4138 | AB925654             | AB925026             |
| <i>Garcinia vilersiana</i>                               | 486          | N 12.9949 | E 105.4138 | AB925655             | AB925027             |
| <i>Zanthoxylum nitidum</i>                               | 487          | N 12.9949 | E 105.414  | AB925656             | AB925028             |
| <i>Gomphandra quadrifida</i>                             | 488          | N 12.9949 | E 105.4142 | AB925657             | AB925029             |
| <i>Beilschmiedia inconspicua</i>                         | 489          | N 12.9948 | E 105.4145 | AB925658             | AB925030             |
| <i>Triadica cochinchinensis</i>                          | 490          | N 12.9951 | E 105.4141 | AB925659             | AB925031             |
| <i>Neuropeltis indochinensis</i>                         | 494          | N 12.9944 | E 105.4139 | AB925660             | AB925032             |
| <i>Mussaenda macrophylla</i>                             | 495          | N 12.9954 | E 105.4133 | AB925661             | AB925033             |
| <i>Baeckea frutescens</i>                                | 496          | N 12.754  | E 105.4325 | AB925662             | AB925034             |
| <i>Ploiarium alternifolium</i>                           | 497          | N 12.754  | E 105.4325 | AB925663             | AB925035             |
| <i>Gluta laccifera</i> _Type B                           | 499          | N 12.7549 | E 105.4338 | AB925664             | AB925036             |
| <i>Catunaregam tomentosa</i>                             | 500          | N 12.7549 | E 105.4338 | AB925665             | AB925037             |
| <i>Syzygium cumini</i>                                   | 501          | N 12.7549 | E 105.4338 | AB925666             | AB925038             |
| <i>Syzygium zeylanicum</i>                               | 503          | N 12.7545 | E 105.4338 | AB925667             | AB925039             |
| <i>Symplocos acuminata</i>                               | 504          | N 12.7545 | E 105.4338 | AB925668             | AB925040             |

Table S1. continued

| Scientific name                                     | Specimen No. | Latitude  | Longitude  | Accession No. (rbcL) | Accession No. (matK) |
|-----------------------------------------------------|--------------|-----------|------------|----------------------|----------------------|
| <i>Gnetum leptostachyum</i>                         | 505          | N 12.7545 | E 105.4338 | AB925669             | AB925041             |
| <i>Fagraea racemosa</i>                             | 508          | N 12.7543 | E 105.4343 | AB925670             | AB925042             |
| <i>Baccaurea</i> sp. FU-511                         | 511          | N 12.754  | E 105.4319 | AB925671             | AB925043             |
| <i>Glochidion kerrii</i>                            | 513          | N 12.754  | E 105.4319 | AB925672             | AB925044             |
| <i>Desmodium heterocarpon</i>                       | 514          | N 12.754  | E 105.4319 | AB925673             | AB925045             |
| <i>Macaranga griffithiana</i>                       | 515          | N 12.7537 | E 105.4315 | AB925674             | AB925046             |
| <i>Ilex wallichii</i>                               | 518          | N 12.7537 | E 105.4315 | AB925675             | AB925047             |
| <i>Calophyllum soulattri</i>                        | 519          | N 12.7537 | E 105.4315 | AB925676             | AB925048             |
| <i>Elaeocarpus petiolatus</i>                       | 520          | N 12.7537 | E 105.4315 | AB925677             | AB925049             |
| <i>Uvaria hahnii</i>                                | 521          | N 12.7537 | E 105.4315 | AB925678             | AB925050             |
| <i>Symplocos racemosa</i>                           | 522          | N 12.6645 | E 105.2816 | AB925679             | AB925051             |
| <i>Memecylon scutellatum</i>                        | 523          | N 12.6645 | E 105.2818 | AB925680             | AB925052             |
| <i>Garcinia</i> sp. FU-524                          | 524          | N 12.6641 | E 105.2826 | AB925681             | -                    |
| <i>Gardenia coronaria</i> _Type A                   | 525          | N 12.6643 | E 105.2827 | AB925682             | AB925053             |
| <i>Xylopia vielana</i>                              | 527          | N 12.6648 | E 105.2832 | AB925683             | AB925054             |
| <i>Smilax cambodiana</i>                            | 533          | N 12.6645 | E 105.2818 | AB925684             | AB925055             |
| <i>Lepisanthes rubiginosa</i>                       | 535          | N 11.9872 | E 104.7405 | AB925685             | AB925056             |
| <i>Cratoxylum formosum</i>                          | 536          | N 11.9872 | E 104.7406 | AB925686             | AB925057             |
| <i>Xylopia pierrei</i> _Type A                      | 537          | N 11.9871 | E 104.741  | AB925687             | AB925058             |
| <i>Lagerstroemia floribunda</i>                     | 539          | N 11.9861 | E 104.7421 | AB925688             | AB925059             |
| <i>Beilschmiedia roxburghiana</i>                   | 540          | N 11.9864 | E 104.7427 | AB925689             | AB925060             |
| <i>Scleropyrum pentandrum</i> _Type A               | 542          | N 11.9877 | E 104.7427 | AB925690             | AB925061             |
| <i>Litsea glutinosa</i>                             | 543          | N 11.9877 | E 104.7426 | AB925691             | AB925062             |
| <i>Gardenia coronaria</i> _Type B                   | 545          | N 11.9833 | E 104.7333 | AB925692             | AB925063             |
| <i>Ficus microcarpa</i>                             | 546          | N 11.9833 | E 104.7333 | AB925693             | AB925064             |
| <i>Breynia vitis-idaea</i>                          | 547          | N 11.9833 | E 104.7333 | AB925694             | AB925065             |
| <i>Dasymaschalon lomentaceum</i>                    | 548          | N 11.9833 | E 104.7333 | AB925695             | AB925066             |
| <i>Uvaria siamensis</i>                             | 549          | N 11.9833 | E 104.7333 | AB925696             | AB925067             |
| <i>Allophylus serratus</i>                          | 550          | N 11.9833 | E 104.7333 | AB925697             | AB925068             |
| <i>Semecarpus cochinchinensis</i>                   | 551          | N 11.9926 | E 104.7443 | AB925698             | AB925069             |
| <i>Garcinia harmandii</i>                           | 552          | N 11.9926 | E 104.7443 | AB925699             | AB925070             |
| <i>Feroniella lucida</i>                            | 553          | N 11.9926 | E 104.7443 | AB925700             | AB925071             |
| <i>Buchanania siamensis</i>                         | 554          | N 11.9924 | E 104.744  | AB925701             | AB925072             |
| <i>Terminalia alata</i>                             | 555          | N 11.9918 | E 104.7434 | AB925702             | AB925073             |
| <i>Acacia pennata</i> subsp. <i>insuavis</i> _TypeA | 556          | N 11.9916 | E 104.743  | AB925703             | AB925074             |

Table S1. continued

| Scientific name                                     | Specimen No. | Latitude  | Longitude  | Accession No. (rbcL) | Accession No. (matK) |
|-----------------------------------------------------|--------------|-----------|------------|----------------------|----------------------|
| <i>Pachygone dasycarpa</i>                          | 883          | N 12.5772 | E 105.3612 | AB925704             | AB925075             |
| <i>Kibatalia laurifolia</i>                         | 884          | N 12.5772 | E 105.3612 | AB925705             | AB925076             |
| <i>Benkara armigera</i>                             | 885          | N 12.5772 | E 105.3612 | AB925706             | AB925077             |
| <i>Antidesma japonicum</i>                          | 886          | N 12.5772 | E 105.3612 | AB925707             | AB925078             |
| <i>Aglaia elaeagnoidea</i>                          | 887          | N 12.5772 | E 105.3612 | AB925708             | AB925079             |
| <i>Syzygium</i> sp. FU-888                          | 888          | N 12.5772 | E 105.3612 | AB925709             | AB925080             |
| <i>Ventilago harmandiana</i>                        | 889          | N 12.5772 | E 105.3612 | AB925710             | AB925081             |
| <i>Neuropeltis indochinensis</i>                    | 890          | N 12.5772 | E 105.3612 | AB925711             | AB925082             |
| <i>Polyalthia debilis</i>                           | 891          | N 12.5772 | E 105.3612 | AB925712             | AB925083             |
| <i>Olex scandens</i>                                | 892          | N 12.5772 | E 105.3612 | AB925713             | AB925084             |
| <i>Prismatomeris sessiliflora</i> _Type A           | 893          | N 12.5772 | E 105.3612 | AB925714             | AB925085             |
| <i>Shorea obtusa</i> _Type A                        | 894          | N 12.5772 | E 105.3612 | AB925715             | AB925086             |
| <i>Acacia pennata</i> subsp. <i>insuavis</i> _TypeA | 895          | N 12.5772 | E 105.3612 | AB925716             | AB925087             |
| <i>Coptosapelta flavescens</i>                      | 896          | N 12.5772 | E 105.3612 | AB925717             | AB925088             |
| <i>Trigonostemon</i> sp. FU-897                     | 897          | N 12.5772 | E 105.3612 | AB925718             | AB925089             |
| <i>Lasianthus formosensis</i>                       | 898          | N 12.5772 | E 105.3612 | AB925719             | AB925090             |
| <i>Sterculia stigmarota</i>                         | 899          | N 12.5772 | E 105.3612 | AB925720             | AB925091             |
| <i>Loeseneriella pauciflora</i>                     | 900          | N 12.5772 | E 105.3612 | AB925721             | AB925092             |
| <i>Parameria laevigata</i>                          | 901          | N 12.5772 | E 105.3612 | AB925722             | AB925093             |
| <i>Ellipanthus tomentosus</i>                       | 902          | N 12.5772 | E 105.3612 | AB925723             | AB925094             |
| <i>Ardisia polysticta</i>                           | 903          | N 12.5772 | E 105.3612 | AB925724             | AB925095             |
| <i>Antidesma puncticulatum</i>                      | 904          | N 12.5772 | E 105.3612 | AB925725             | AB925096             |
| <i>Stixis scandens</i>                              | 905          | N 12.5771 | E 105.3609 | AB925726             | AB925097             |
| <i>Neuropeltis indochinensis</i>                    | 906          | N 12.5771 | E 105.3608 | AB925727             | AB925098             |
| <i>Hoya oblongacutifolia</i>                        | 908          | N 12.5771 | E 105.3609 | AB925728             | -                    |
| <i>Polyalthia debilis</i>                           | 909          | N 12.5771 | E 105.3609 | AB925729             | AB925099             |
| <i>Lasianthus hirsutus</i>                          | 911          | N 12.5772 | E 105.3608 | AB925730             | AB925100             |
| <i>Psychotria adenophylla</i>                       | 912          | N 12.5771 | E 105.3608 | AB925731             | AB925101             |
| <i>Calophyllum calaba</i> var. <i>bracteatum</i>    | 913          | N 12.5771 | E 105.3609 | AB925732             | AB925102             |
| <i>Lasianthus</i> sp. FU-914                        | 914          | N 12.5771 | E 105.3608 | AB925733             | AB925103             |
| <i>Tarenna hoaensis</i>                             | 915          | N 12.5771 | E 105.3607 | AB925734             | AB925104             |
| <i>Caryota sympetala</i>                            | 916          | N 12.5772 | E 105.3606 | AB925735             | AB925105             |
| <i>Spatholobus acuminatus</i>                       | 917          | N 12.5771 | E 105.3606 | AB925736             | AB925106             |
| <i>Ventilago harmandiana</i>                        | 918          | N 12.5771 | E 105.3606 | AB925737             | AB925107             |
| <i>Goniothalamus tamirensis</i>                     | 919          | N 12.5771 | E 105.3606 | AB925738             | AB925108             |

Table S1. continued

| Scientific name                                          | Specimen No. | Latitude  | Longitude  | Accession No. (rbcL) | Accession No. (matK) |
|----------------------------------------------------------|--------------|-----------|------------|----------------------|----------------------|
| <i>Erycibe cochinchinensis</i>                           | 920          | N 12.5771 | E 105.3605 | AB925739             | AB925109             |
| <i>Syzygium</i> sp. FU-922                               | 922          | N 12.577  | E 105.3604 | AB925740             | AB925110             |
| <i>Desmos</i> sp. FU-923                                 | 923          | N 12.5771 | E 105.3604 | AB925741             | AB925111             |
| <i>Salacia typhina</i>                                   | 925          | N 12.577  | E 105.3603 | AB925742             | AB925112             |
| <i>Mitrephora tomentosa</i>                              | 927          | N 12.5769 | E 105.3613 | AB925743             | AB925113             |
| <i>Syzygium oblatum</i>                                  | 928          | N 12.5769 | E 105.3613 | AB925744             | AB925114             |
| <i>Amphineurion marginatum</i> _Type B                   | 929          | N 12.5769 | E 105.3613 | AB925745             | AB925115             |
| <i>Bauhinia bracteata</i>                                | 930          | N 12.5769 | E 105.3612 | AB925746             | AB925116             |
| <i>Anacolosia clarkii</i>                                | 931          | N 12.5769 | E 105.3612 | AB925747             | AB925117             |
| <i>Sindora siamensis</i>                                 | 932          | N 12.5769 | E 105.3612 | AB925748             | AB925118             |
| <i>Uvaria hahnii</i>                                     | 933          | N 12.5771 | E 105.3616 | AB925749             | AB925119             |
| <i>Mallotus nanus</i>                                    | 936          | N 12.5785 | E 105.3624 | AB925750             | AB925120             |
| <i>Psydrax dicoccos</i>                                  | 937          | N 12.5788 | E 105.3626 | AB925751             | AB925121             |
| <i>Ellipanthus tomentosus</i>                            | 938          | N 12.5788 | E 105.3626 | AB925752             | AB925122             |
| <i>Glycosmis macrophylla</i>                             | 939          | N 12.5793 | E 105.3629 | AB925753             | AB925123             |
| <i>Chionanthus mala-elengi</i> subsp. <i>terniflorus</i> | 940          | N 12.5794 | E 105.3634 | AB925754             | AB925124             |
| <i>Benkara armigera</i>                                  | 941          | N 12.5799 | E 105.3634 | AB925755             | AB925125             |
| <i>Memecylon ovatum</i> _Type B                          | 942          | N 12.58   | E 105.3635 | AB925756             | AB925126             |
| <i>Polyalthia debilis</i>                                | 943          | N 12.5806 | E 105.3638 | AB925757             | AB925127             |
| <i>Xerospermum noronhianum</i>                           | 944          | N 12.5787 | E 105.3626 | AB925758             | AB925128             |
| <i>Aporosa planchoniana</i>                              | 945          | N 12.578  | E 105.3622 | AB925759             | AB925129             |
| <i>Xerospermum noronhianum</i>                           | 946          | N 12.578  | E 105.3622 | AB925760             | AB925130             |
| <i>Nephelium hypoleucum</i>                              | 947          | N 12.578  | E 105.3622 | AB925761             | AB925131             |
| <i>Tabernaemontana pauciflora</i>                        | 948          | N 12.5759 | E 105.3902 | AB925762             | AB925132             |
| <i>Toxocarpus lagenifer</i>                              | 949          | N 12.5759 | E 105.3902 | AB925763             | AB925133             |
| <i>Syzygium syzygioides</i>                              | 951          | N 12.5759 | E 105.3902 | AB925764             | AB925134             |
| <i>Lophopetalum duperreanum</i>                          | 952          | N 12.5759 | E 105.3902 | AB925765             | -                    |
| <i>Xerospermum noronhianum</i>                           | 953          | N 12.5759 | E 105.3902 | AB925766             | AB925135             |
| <i>Strophanthus perakensis</i>                           | 954          | N 12.5779 | E 105.3622 | AB925767             | AB925136             |
| <i>Dregea</i> sp. FU-957                                 | 957          | N 12.5764 | E 105.3839 | AB925768             | AB925137             |
| <i>Xerospermum noronhianum</i>                           | 960          | N 12.5771 | E 105.3612 | AB925769             | AB925138             |
| <i>Xerospermum noronhianum</i>                           | 964          | N 12.5771 | E 105.3612 | AB925770             | AB925139             |
| <i>Xerospermum noronhianum</i>                           | 977          | N 12.5771 | E 105.3604 | AB925771             | AB925140             |
| <i>Aglaia elaeagnoidea</i>                               | 979          | N 12.5771 | E 105.3604 | AB925772             | AB925141             |
| <i>Memecylon scutellatum</i>                             | 980          | N 12.6651 | E 105.2798 | AB925773             | AB925142             |

Table S1. continued

| Scientific name                         | Specimen No. | Latitude  | Longitude  | Accession No. (rbcL) | Accession No. (matK) |
|-----------------------------------------|--------------|-----------|------------|----------------------|----------------------|
| <i>Smilax cambodiana</i>                | 982          | N 12.6651 | E 105.2797 | AB925774             | AB925143             |
| <i>Symplocos racemosa</i>               | 983          | N 12.6652 | E 105.2796 | AB925775             | AB925144             |
| <i>Dunbaria longiracemosa</i>           | 985          | N 12.6651 | E 105.2797 | AB925776             | AB925145             |
| <i>Gluta laccifera_Type B</i>           | 986          | N 12.6651 | E 105.2794 | AB925777             | AB925146             |
| <i>Symplocos racemosa</i>               | 988          | N 12.6651 | E 105.2794 | AB925778             | AB925147             |
| <i>Trigonostemon</i> sp. FU-989         | 989          | N 12.6651 | E 105.2793 | AB925779             | AB925148             |
| <i>Indigofera wightii</i>               | 990          | N 12.6651 | E 105.2793 | AB925780             | AB925149             |
| <i>Cratoxylum formosum</i>              | 991          | N 12.6652 | E 105.2798 | AB925781             | AB925150             |
| <i>Streptocaulon juventas</i>           | 992          | N 12.6652 | E 105.2798 | AB925782             | AB925151             |
| <i>Aporosa villosa</i>                  | 994          | N 12.6649 | E 105.2791 | AB925783             | AB925152             |
| <i>Prismatomeris filamentosa_Type B</i> | 995          | N 12.6649 | E 105.279  | AB925784             | AB925153             |
| <i>Erythrophleum teysmannii</i>         | 998          | N 12.6649 | E 105.279  | AB925785             | AB925154             |
| <i>Salacia chinensis</i>                | 999          | N 12.6649 | E 105.279  | AB925786             | AB925155             |
| <i>Syzygium chanlos</i>                 | 1000         | N 12.6648 | E 105.2788 | AB925787             | AB925156             |
| <i>Ellipanthus tomentosus</i>           | 1001         | N 12.6651 | E 105.2798 | AB925788             | AB925157             |
| <i>Goniothalamus tamirensis</i>         | 1002         | N 12.665  | E 105.2789 | AB925789             | AB925158             |
| <i>Helicteres angustifolia</i>          | 1003         | N 12.6651 | E 105.2789 | AB925790             | AB925159             |
| <i>Madhuca butyrospermoides</i>         | 1005         | N 12.6651 | E 105.279  | AB925791             | AB925160             |
| <i>Aporosa villosa</i>                  | 1007         | N 12.6651 | E 105.279  | AB925792             | AB925161             |
| <i>Careya arborea</i>                   | 1008         | N 12.6651 | E 105.2804 | AB925793             | AB925162             |
| <i>Gluta laccifera_Type B</i>           | 1009         | N 12.665  | E 105.2805 | AB925794             | AB925163             |
| <i>Gluta laccifera_Type B</i>           | 1010         | N 12.6651 | E 105.2805 | AB925795             | AB925164             |
| <i>Anneslea fragans</i>                 | 1011         | N 12.6857 | E 105.2751 | AB925796             | AB925165             |
| <i>Bhesa robusta</i>                    | 1012         | N 12.6857 | E 105.2751 | AB925797             | AB925166             |
| <i>Calamus</i> sp. FU-1013              | 1013         | N 12.6858 | E 105.2751 | AB925798             | AB925167             |
| <i>Dendrotrophe varians</i>             | 1014         | N 12.6858 | E 105.275  | AB925799             | AB925168             |
| <i>Symplocos acuminata</i>              | 1015         | N 12.6858 | E 105.275  | AB925800             | AB925169             |
| <i>Psychotria serpens</i>               | 1016         | N 12.6853 | E 105.2755 | AB925801             | AB925170             |
| <i>Ixora cibdela</i>                    | 1018         | N 12.6858 | E 105.2751 | AB925802             | AB925171             |
| <i>Memecylon chevalieri</i>             | 1019         | N 12.6338 | E 105.2641 | AB925803             | AB925172             |
| <i>Colona auriculata</i>                | 1020         | N 12.6338 | E 105.2641 | AB925804             | AB925173             |
| <i>Syzygium cumini</i>                  | 1021         | N 12.6338 | E 105.2639 | AB925805             | AB925174             |
| <i>Cinnamomum bejolghota</i>            | 1022         | N 12.6339 | E 105.2634 | AB925806             | AB925175             |
| <i>Lithocarpus harmandii</i>            | 1023         | N 12.6339 | E 105.2634 | AB925807             | AB925176             |
| <i>Vitex pinnata_Type C</i>             | 1024         | N 12.6339 | E 105.2633 | AB925808             | AB925177             |

Table S1. continued

| Scientific name                                      | Specimen No. | Latitude  | Longitude  | Accession No. (rbcL) | Accession No. (matK) |
|------------------------------------------------------|--------------|-----------|------------|----------------------|----------------------|
| <i>Gardenia</i> sp. FU-1025                          | 1025         | N 12.6339 | E 105.2634 | AB925809             | AB925178             |
| <i>Barringtonia acutangula</i>                       | 1026         | N 12.6339 | E 105.2634 | AB925810             | AB925179             |
| <i>Glochidion</i> sp. FU-1028                        | 1028         | N 12.634  | E 105.2634 | AB925811             | AB925180             |
| <i>Hymenocardia punctata</i>                         | 1029         | N 12.6337 | E 105.268  | AB925812             | AB925181             |
| <i>Murraya</i> sp. FU-1030                           | 1030         | N 12.6337 | E 105.268  | AB925813             | AB925182             |
| <i>Dalbergia thorelii</i>                            | 1033         | N 12.6337 | E 105.268  | AB925814             | AB925183             |
| <i>Cratoxylum formosum</i>                           | 1034         | N 12.6337 | E 105.268  | AB925815             | AB925184             |
| <i>Vitex pinnata</i> _Type D                         | 1036         | N 12.6337 | E 105.2679 | AB925816             | AB925185             |
| <i>Erythroxylum cambodianum</i>                      | 1037         | N 12.6337 | E 105.2679 | AB925817             | AB925186             |
| <i>Salacia typhina</i>                               | 1038         | N 12.6337 | E 105.2679 | AB925818             | AB925187             |
| <i>Ichnocarpus</i> sp. FU-1039                       | 1039         | N 12.6338 | E 105.268  | AB925819             | AB925188             |
| <i>Calamus tetradactylus</i>                         | 1040         | N 12.6338 | E 105.2679 | AB925820             | AB925189             |
| <i>Connarus cochinchinensis</i>                      | 1041         | N 12.6338 | E 105.2679 | AB925821             | AB925190             |
| <i>Cratoxylum formosum</i>                           | 1042         | N 12.6338 | E 105.2679 | AB925822             | AB925191             |
| <i>Tabernaemontana bufalina</i>                      | 1043         | N 12.6338 | E 105.2679 | AB925823             | AB925192             |
| <i>Uvaria fauveliana</i>                             | 1044         | N 12.6338 | E 105.2678 | AB925824             | AB925193             |
| <i>Diospyros vera</i> _Type A                        | 1045         | N 12.6338 | E 105.2678 | AB925825             | AB925194             |
| <i>Vitex pinnata</i> _Type C                         | 1046         | N 12.6338 | E 105.2677 | AB925826             | AB925195             |
| <i>Calamus viminalis</i>                             | 1047         | N 12.6338 | E 105.2677 | AB925827             | AB925196             |
| <i>Salacia chinensis</i>                             | 1048         | N 12.6338 | E 105.2676 | AB925828             | AB925197             |
| <i>Scleropyrum pentandrum</i> _Type B                | 1049         | N 12.6338 | E 105.2675 | AB925829             | AB925198             |
| <i>Abrus pulchellus</i> subsp. <i>mollis</i>         | 1050         | N 12.6338 | E 105.2675 | AB925830             | AB925199             |
| <i>Acacia pennata</i> subsp. <i>insuavis</i> _Type B | 1051         | N 12.6338 | E 105.2676 | AB925831             | AB925200             |
| <i>Antidesma montanum</i>                            | 1052         | N 12.6338 | E 105.2675 | AB925832             | AB925201             |
| <i>Smilax inversa</i>                                | 1053         | N 12.6337 | E 105.2672 | AB925833             | AB925202             |
| <i>Hypserpa nitida</i>                               | 1054         | N 12.6337 | E 105.2673 | AB925834             | AB925203             |
| <i>Smilax lanceifolia</i>                            | 1055         | N 12.6337 | E 105.2682 | AB925835             | AB925204             |
| <i>Suregada glomerulata</i>                          | 1056         | N 12.6337 | E 105.2704 | AB925836             | AB925205             |
| <i>Scleropyrum pentandrum</i> _Type B                | 1057         | N 12.6336 | E 105.2705 | AB925837             | AB925206             |
| <i>Uvaria hahnii</i>                                 | 1058         | N 12.5903 | E 105.2696 | AB925838             | AB925207             |
| <i>Glycosmis macrophylla</i>                         | 1059         | N 12.578  | E 105.3914 | AB925839             | AB925208             |
| <i>Anacolosa griffithii</i>                          | 1061         | N 12.5779 | E 105.3915 | AB925840             | AB925209             |
| <i>Garcinia oliveri</i>                              | 1063         | N 12.5779 | E 105.3913 | AB925841             | AB925210             |
| <i>Ternstroemia wallichiana</i>                      | 1064         | N 12.5779 | E 105.3911 | AB925842             | AB925211             |
| <i>Syzygium chanlos</i>                              | 1065         | N 12.578  | E 105.3911 | AB925843             | AB925212             |



Table S1. continued

| Scientific name                         | Specimen No. | Latitude  | Longitude  | Accession No. (rbcL) | Accession No. (matK) |
|-----------------------------------------|--------------|-----------|------------|----------------------|----------------------|
| <i>Aglaia elaeagnoidea</i>              | 1066         | N 12.5777 | E 105.3914 | AB925844             | AB925213             |
| <i>Lophopetalum duperreanum</i>         | 1069         | N 12.5778 | E 105.3914 | AB925845             | AB925214             |
| <i>Xerospermum noronhianum</i>          | 1070         | N 12.5778 | E 105.3914 | AB925846             | AB925215             |
| <i>Chonemorpha verrucosa</i>            | 1071         | N 12.5779 | E 105.3913 | AB925847             | AB925216             |
| <i>Syzygium grande</i>                  | 1072         | N 12.5779 | E 105.3913 | AB925848             | AB925217             |
| <i>Antidesma montanum</i>               | 1073         | N 12.578  | E 105.3913 | AB925849             | AB925218             |
| <i>Syzygium syzygioides</i>             | 1075         | N 12.5779 | E 105.3913 | AB925850             | AB925219             |
| <i>Syzygium chanlos</i>                 | 1076         | N 12.5777 | E 105.3914 | AB925851             | AB925220             |
| <i>Xerospermum noronhianum</i>          | 1077         | N 12.5779 | E 105.3904 | AB925852             | AB925221             |
| <i>Aspidopterys thorelii</i>            | 1078         | N 12.5778 | E 105.3905 | AB925853             | AB925222             |
| <i>Syzygium syzygioides</i>             | 1079         | N 12.5778 | E 105.3906 | AB925854             | AB925223             |
| <i>Antidesma puncticulatum</i>          | 1080         | N 12.5778 | E 105.3905 | AB925855             | AB925224             |
| <i>Vitex pinnata_Type B</i>             | 1083         | N 12.5779 | E 105.3906 | AB925856             | AB925225             |
| <i>Alstonia scholaris</i>               | 1085         | N 12.5779 | E 105.3906 | AB925857             | AB925226             |
| <i>Bridelia curtisii</i>                | 1086         | N 12.5779 | E 105.3906 | AB925858             | AB925227             |
| <i>Artabotrys oblongus</i>              | 1087         | N 12.5779 | E 105.3906 | AB925859             | AB925228             |
| <i>Cansjera rheedei</i>                 | 1089         | N 11.9887 | E 104.7408 | AB925860             | AB925229             |
| <i>Carallia brachiata_Type A</i>        | 1092         | N 11.9887 | E 104.7408 | AB925861             | AB925230             |
| <i>Olex wightiana</i>                   | 1093         | N 11.9887 | E 104.7408 | AB925862             | AB925231             |
| <i>Clausena</i> sp. FU-1094             | 1094         | N 11.9887 | E 104.7408 | AB925863             | AB925232             |
| <i>Mallotus</i> sp. FU-1097             | 1097         | N 11.9887 | E 104.7408 | AB925864             | AB925233             |
| <i>Amphineurion marginatum_Type A</i>   | 1098         | N 11.9887 | E 104.7408 | AB925865             | AB925234             |
| <i>Diospyros vera_Type B</i>            | 1099         | N 11.9887 | E 104.7408 | AB925866             | AB925235             |
| <i>Polyalthia luensis</i>               | 1101         | N 11.9887 | E 104.7408 | AB925867             | AB925236             |
| <i>Strophanthus caudatus</i>            | 1103         | N 11.9887 | E 104.7408 | AB925868             | AB925237             |
| <i>Dalbergia thorelii</i>               | 1105         | N 11.9887 | E 104.7408 | AB925869             | AB925238             |
| <i>Cansjera rheedei</i>                 | 1106         | N 11.9887 | E 104.7409 | AB925870             | AB925239             |
| <i>Asparagus</i> sp. FU-1107            | 1107         | N 11.9886 | E 104.741  | AB925871             | AB925240             |
| <i>Syzygium cumini</i>                  | 1108         | N 11.9885 | E 104.7409 | AB925872             | AB925241             |
| <i>Prismatomeris filamentosa_Type C</i> | 1109         | N 11.9892 | E 104.7413 | AB925873             | AB925242             |
| <i>Brucea javanica</i>                  | 1110         | N 11.9892 | E 104.7413 | AB925874             | -                    |
| <i>Suregada multiflora</i>              | 1111         | N 11.9892 | E 104.7413 | AB925875             | AB925243             |
| <i>Micromelum minutum</i>               | 1112         | N 11.9892 | E 104.7413 | AB925876             | AB925244             |
| <i>Olex wightiana</i>                   | 1113         | N 11.9892 | E 104.7413 | AB925877             | AB925245             |
| <i>Smilax luzonensis</i>                | 1114         | N 11.9893 | E 104.7414 | AB925878             | AB925246             |

Table S1. continued

| Scientific name                                  | Specimen No. | Latitude  | Longitude  | Accession No. (rbcL) | Accession No. (matK) |
|--------------------------------------------------|--------------|-----------|------------|----------------------|----------------------|
| <i>Dendrophthoe pentandra</i>                    | 1117         | N 11.9894 | E 104.7415 | AB925879             | AB925247             |
| <i>Semecarpus cochinchinensis</i>                | 1118         | N 11.9894 | E 104.7415 | AB925880             | AB925248             |
| <i>Olax wightiana</i>                            | 1119         | N 11.9898 | E 104.7418 | AB925881             | AB925249             |
| <i>Ixora nigricans</i>                           | 1120         | N 11.9898 | E 104.7418 | AB925882             | AB925250             |
| <i>Diospyros castanea</i>                        | 1121         | N 11.9898 | E 104.7418 | AB925883             | AB925251             |
| <i>Suregada multiflora</i>                       | 1122         | N 11.9898 | E 104.7417 | AB925884             | AB925252             |
| <i>Strychnos nux-vomica</i>                      | 1123         | N 11.9898 | E 104.7417 | AB925885             | AB925253             |
| <i>Uvaria rufa</i>                               | 1124         | N 11.9896 | E 104.7416 | AB925886             | AB925254             |
| <i>Antidesma</i> sp. FU-1126                     | 1126         | N 11.9896 | E 104.7416 | AB925887             | AB925255             |
| <i>Abrus pulchellus</i> subsp. <i>mollis</i>     | 2301         | N 12.6337 | E 105.2692 | AB925888             | AB925256             |
| <i>Erythroxylum</i> sp. FU-2303                  | 2303         | N 12.6337 | E 105.2718 | AB925889             | AB925257             |
| <i>Allophylus</i> sp. FU-2306                    | 2306         | N 12.6334 | E 105.2715 | AB925890             | AB925258             |
| <i>Ixora</i> sp. FU-2572                         | 2572         | -         | -          | AB925891             | AB925259             |
| <i>Elaeocarpus</i> sp. FU-2574                   | 2574         | -         | -          | AB925892             | AB925260             |
| <i>Syzygium oblatum</i>                          | 2587         | N 12.5771 | E 105.3906 | AB925893             | AB925261             |
| <i>Syzygium grande</i>                           | 2602         | N 12.7418 | E 15.4817  | AB925894             | AB925262             |
| <i>Ixora</i> sp. FU-2603                         | 2603         | N 12.7418 | E 15.4817  | AB925895             | AB925263             |
| <i>Syzygium oblatum</i>                          | 2604         | N 12.7418 | E 15.4817  | AB925896             | AB925264             |
| <i>Ixora</i> sp. FU-2607                         | 2607         | N 12.9716 | E 105.4204 | AB925897             | AB925265             |
| <i>Beilschmiedia inconspicua</i>                 | 2609         | N 12.9716 | E 105.4204 | AB925898             | AB925266             |
| <i>Memecylon</i> sp. FU-2611                     | 2611         | N 12.9716 | E 105.4204 | AB925899             | AB925267             |
| <i>Ixora</i> sp. FU-2613                         | 2613         | N 12.9716 | E 105.4204 | AB925900             | AB925268             |
| <i>Syzygium grande</i>                           | 2623         | N 12.9717 | E 105.4198 | AB925901             | AB925269             |
| <i>Bauhinia</i> sp. FU-2629                      | 2629         | N 12.5771 | E 105.3604 | AB925902             | AB925270             |
| <i>Canthium cambodianum</i>                      | 2632         | N 12.5771 | E 105.3604 | AB925903             | AB925271             |
| <i>Elaeocarpus</i> sp. FU-2636                   | 2636         | N 12.578  | E 105.3604 | AB925904             | AB925272             |
| <i>Markhamia stipulata</i> var. <i>pierrii</i>   | 2637         | N 12.578  | E 105.3604 | AB925905             | AB925273             |
| <i>Syzygium chanlos</i>                          | 2647         | N 12.5779 | E 105.3613 | AB925906             | AB925274             |
| <i>Syzygium oblatum</i>                          | 2658         | N 12.5758 | E 105.3896 | AB925907             | AB925275             |
| <i>Diospyros</i> sp. FU-2688                     | 2668         | N 12.9949 | E 105.4138 | AB925908             | AB925276             |
| <i>Diospyros</i> sp. FU-2673                     | 2673         | N 12.9949 | E 105.4138 | AB925909             | AB925277             |
| <i>Dehaasia poilanei</i>                         | 2684         | N 12.9941 | E 105.4138 | AB925910             | AB925278             |
| <i>Syzygium grande</i>                           | 2687         | N 12.5759 | E 105.3904 | AB925911             | AB925279             |
| <i>Calophyllum calaba</i> var. <i>bracteatum</i> | 2706         | N 12.6641 | E 105.2826 | AB925912             | AB925280             |
| <i>Syzygium syzygioides</i>                      | 2711         | N 13.0744 | E 105.3925 | AB925913             | AB925281             |

Table S1. continued

| Scientific name              | Specimen<br>No. | Latitude  | Longitude  | Accession No.<br>(rbcL) | Accession No.<br>(matK) |
|------------------------------|-----------------|-----------|------------|-------------------------|-------------------------|
| <i>Ficus</i> sp. FU-2712     | 2712            | N 13.0744 | E 105.3925 | AB925914                | AB925282                |
| <i>Ficus</i> sp. FU-2714     | 2714            | N 13.0744 | E 105.3935 | AB925915                | AB925283                |
| <i>Diospyros</i> sp. FU-2715 | 2715            | N 13.0744 | E 105.3935 | AB925916                | AB925284                |
| <i>Syzygium cinereum</i>     | 3812            | N 11.9855 | E 104.9391 | AB925917                | -                       |

Table S2. Summary of the GLMs (GLMMs) and Wald test for logging, mortality and recruitment. Species name as explanation variables are shown in first column. The estimated coefficient and z value are shown in each depending variables (logging, mortality and recruitment). Asterisks and bold letters show a statistically significance (\*p < 0.05, \*\* p < 0.01, \*\*\* p < 0.001).

| Variable                                                 | Logging |         | Mortality     |                   | Recruitment  |                      |
|----------------------------------------------------------|---------|---------|---------------|-------------------|--------------|----------------------|
|                                                          | coeff.  | z value | coeff.        | z value           | coeff.       | z value              |
| <i>Melodorum fruticosum</i>                              | -0.320  | -0.597  | <b>-2.420</b> | <b>-3.943 ***</b> | 0.098        | 0.182                |
| <i>Xylopia pierrei_Type A</i>                            | 0.457   | 0.419   | -19.810       | -0.004            | -21.220      | -0.001               |
| <i>Xylopia vielana</i>                                   | -0.486  | -0.411  | -19.820       | -0.005            | <b>2.351</b> | <b>2.001 *</b>       |
| <i>Knema globularia</i>                                  | -1.220  | -1.595  | <b>-3.585</b> | <b>-3.275 **</b>  | <b>1.537</b> | <b>2.499 *</b>       |
| <i>Beilschmiedia roxburghiana</i>                        | -15.810 | -0.003  | -19.760       | -0.002            | -15.640      | -0.005               |
| <i>Beilschmiedia inconspicua</i>                         | -0.256  | -0.255  | -1.459        | -1.231            | -17.440      | -0.004               |
| <i>Cinnamomum polyadelphum</i>                           | -0.545  | -0.613  | <b>-2.501</b> | <b>-2.237 *</b>   | -0.066       | -0.086               |
| <i>Dehaasia cuneata</i>                                  | 0.008   | 0.012   | -1.092        | -1.565            | -0.695       | -0.888               |
| <i>Dehaasia poilanei</i>                                 | -0.188  | -0.194  | -19.720       | -0.004            | 0.181        | 0.187                |
| <i>Litsea vang</i>                                       | -1.126  | -1.224  | -2.036        | -1.797            | 0.167        | 0.201                |
| <i>Phoebe lanceolata</i>                                 | -17.100 | -0.002  | -19.680       | -0.002            | -13.800      | -0.010               |
| <i>Anacolosa griffithii</i>                              | -17.270 | -0.005  | -19.580       | -0.003            | 25.820       | 0.000                |
| <i>Diospyros</i> sp. FU-2688                             | -18.090 | -0.006  | -19.410       | -0.005            | -1.017       | -0.879               |
| <i>Diospyros</i> sp. FU-2673                             | -16.320 | -0.004  | -19.740       | -0.002            | -24.240      | 0.000                |
| <i>Diospyros</i> sp. FU-2715                             | -18.490 | -0.002  | -20.090       | -0.002            | -14.900      | -0.005               |
| <i>Diospyros venosa</i>                                  | -0.676  | -1.262  | <b>-2.345</b> | <b>-3.824 ***</b> | 0.239        | 0.450                |
| <i>Diospyros filipendula</i>                             | -1.037  | -1.123  | <b>-2.434</b> | <b>-2.165 *</b>   | -0.609       | -0.668               |
| <i>Diospyros undulate</i> var. <i>cratericalyx</i>       | -1.503  | -1.668  | -1.422        | -1.837            | -0.774       | -0.871               |
| <i>Diospyros vera_Type A</i>                             | 1.219   | 1.349   | -1.730        | -1.955            | -20.060      | -0.002               |
| <i>Diospyros pilosantha_Type A</i>                       | 0.345   | 0.387   | -19.410       | -0.005            | -19.290      | -0.002               |
| <i>Diospyros pilosantha_Type B</i>                       | 13.570  | 0.009   | -19.620       | -0.002            | -15.070      | -0.005               |
| <i>Anneslea fragans</i>                                  | -16.350 | -0.004  | -1.331        | -1.082            | 22.020       | 0.001                |
| <i>Ternstroemia wallichiana</i>                          | -15.610 | -0.007  | -19.860       | -0.004            | 0.150        | 0.148                |
| <i>Chrysophyllum roxburghii</i>                          | -1.490  | -1.259  | -19.670       | -0.005            | -0.344       | -0.372               |
| <i>Madhuca butyrospermoides</i>                          | 17.670  | 0.004   | -19.630       | -0.004            | -16.990      | -0.004               |
| <i>Symplocos acuminata</i>                               | 2.054   | 1.718   | -1.803        | -1.566            | -0.861       | -0.736               |
| <i>Alstonia scholaris</i>                                | -13.650 | -0.007  | -19.750       | -0.002            | -13.980      | -0.010               |
| <i>Gardenia coronaria_Type A</i>                         | -17.030 | -0.005  | -19.580       | -0.003            | -14.140      | -0.010               |
| <i>Psydrax pergracilis</i>                               | -0.308  | -0.309  | -19.770       | -0.005            | -0.185       | -0.196               |
| <i>Tarenna hoaensis</i>                                  | -0.410  | -0.277  | -19.820       | -0.003            | -14.170      | -0.010               |
| <i>Markhamia stipulata</i> var. <i>pierrii</i>           | -16.840 | -0.002  | -19.490       | -0.002            | 20.300       | 0.001                |
| <i>Vitex pinnata_Type B</i>                              | 0.704   | 0.659   | -19.700       | -0.004            | 2.020        | 1.670                |
| <i>Chionanthus mala-elengi</i> subsp. <i>terniflorus</i> | -15.770 | -0.006  | -19.870       | -0.004            | -0.555       | -0.448               |
| <i>Adenantha pavonina</i>                                | -16.620 | -0.002  | -19.630       | -0.002            | -13.740      | -0.011               |
| <i>Dialium cochinchinense</i>                            | -18.040 | -0.002  | -19.360       | -0.003            | 0.624        | 0.418                |
| <i>Peltophorum dasyrrhachis</i>                          | -16.840 | -0.004  | -19.320       | -0.002            | 25.350       | 0.000                |
| <i>Sindora siamensis</i>                                 | -0.327  | -0.391  | -19.500       | -0.006            | -0.824       | -0.918               |
| <i>Xanthophyllum colubrinum</i>                          | -0.243  | -0.265  | -19.550       | -0.006            | -1.480       | -1.284               |
| <i>Xanthophyllum flavescens</i>                          | 0.072   | 0.141   | <b>-1.759</b> | <b>-3.069 **</b>  | -0.839       | -1.353               |
| <i>Artocarpus chama</i>                                  | 0.549   | 0.524   | -19.620       | -0.004            | 0.238        | 0.231                |
| <i>Ficus</i> sp. FU-2712                                 | -1.065  | -0.769  | -19.270       | -0.003            | -16.200      | -0.005               |
| <i>Trema orientalis</i>                                  | -17.760 | -0.004  | -19.980       | -0.003            | 27.690       | 6.2×10 <sup>-5</sup> |

Table S2. continued

| Variable                                         | Logging       |                 | Mortality     |                   | Recruitment |         |
|--------------------------------------------------|---------------|-----------------|---------------|-------------------|-------------|---------|
|                                                  | Coeff.        | z value         | Coeff.        | z value           | Coeff.      | z value |
| <i>Castanopsis piriformis</i>                    | -17.650       | -0.004          | -19.770       | -0.003            | 0.015       | 0.012   |
| <i>Lithocarpus harmandii</i>                     | 14.410        | 0.008           | -20.060       | -0.002            | -14.750     | -0.005  |
| <i>Euonymus cochinchinensis</i>                  | 0.521         | 0.339           | -19.480       | -0.003            | 0.761       | 0.507   |
| <i>Lophopetalum duperreanum</i>                  | -0.004        | -0.007          | <b>-2.154</b> | <b>-3.459 ***</b> | 0.196       | 0.355   |
| <i>Ellipanthus tomentosus</i>                    | -14.880       | -0.006          | -19.940       | -0.003            | 24.580      | 0.000   |
| <i>Elaeocarpus</i> sp. FU-2636                   | -17.300       | -0.002          | -19.170       | -0.002            | 20.300      | 0.001   |
| <i>Elaeocarpus stipularis</i>                    | -16.920       | -0.003          | -19.520       | -0.003            | -0.079      | -0.060  |
| <i>Parinari anamensis</i>                        | 0.569         | 0.898           | -19.450       | -0.008            | -0.226      | -0.338  |
| <i>Calophyllum calaba</i> var. <i>bracteatum</i> | -0.267        | -0.380          | <b>-2.251</b> | <b>-2.658 **</b>  | -0.926      | -1.187  |
| <i>Garcinia benthamii</i>                        | 20.000        | 0.002           | -19.740       | -0.002            | -13.740     | -0.011  |
| <i>Garcinia delpyana</i>                         | 2.037         | 1.568           | -19.680       | -0.003            | -0.169      | -0.129  |
| <i>Garcinia hanburyi</i>                         | -15.680       | -0.005          | 19.260        | 0.003             | -17.170     | -0.004  |
| <i>Garcinia lanessanii</i>                       | -16.800       | -0.004          | -19.620       | -0.002            | 23.950      | 0.000   |
| <i>Garcinia merguensis</i>                       | -16.920       | -0.007          | -1.186        | -1.280            | -1.088      | -0.934  |
| <i>Garcinia vilersiana</i>                       | -16.880       | -0.004          | -19.650       | -0.003            | -14.290     | -0.010  |
| <i>Chaetocarpus castanocarpus</i>                | -1.014        | -1.337          | -19.710       | -0.008            | -0.215      | -0.328  |
| <i>Croton poilanei</i>                           | -0.537        | -0.624          | -0.548        | -0.867            | 0.512       | 0.767   |
| <i>Suregada glomerulata</i>                      | 0.603         | 0.521           | -19.670       | -0.004            | -0.320      | -0.257  |
| <i>Irvingia malayana</i>                         | <b>-1.362</b> | <b>-2.230 *</b> | <b>-2.100</b> | <b>-2.826 **</b>  | -1.103      | -1.707  |
| <i>Ochna integerrima</i> _Type B                 | -14.090       | -0.006          | -19.940       | -0.002            | 19.880      | 0.001   |
| <i>Antidesma montanum</i>                        | -1.127        | -1.179          | -0.694        | -0.804            | -19.350     | -0.002  |
| <i>Antidesma puncticulatum</i>                   | -17.260       | -0.004          | -20.030       | -0.003            | 0.767       | 0.511   |
| <i>Aporosa ficifolia</i>                         | -1.387        | -1.538          | -1.689        | -1.931            | -0.634      | -0.706  |
| <i>Aporosa planchoniana</i>                      | -0.242        | -0.300          | -19.850       | -0.007            | 0.822       | 1.146   |
| <i>Aporosa villosa</i>                           | -15.570       | -0.007          | -19.640       | -0.004            | 1.756       | 1.409   |
| <i>Cleistanthus sumatranus</i>                   | -0.281        | -0.319          | -19.810       | -0.006            | -0.073      | -0.097  |
| <i>Carallia brachiata</i> _Type B                | -0.118        | -0.099          | -1.490        | -1.245            | 0.131       | 0.127   |
| <i>Terminalia chebula</i>                        | 16.530        | 0.005           | -19.610       | -0.002            | -23.050     | 0.000   |
| <i>Terminalia nigrovenulosa</i>                  | 1.703         | 1.318           | -19.480       | -0.003            | -0.069      | -0.053  |
| <i>Crypteronia paniculata</i>                    | -17.310       | -0.002          | -19.160       | -0.002            | -13.740     | -0.011  |
| <i>Lagerstroemia duperreana</i>                  | -0.696        | -0.717          | -19.210       | -0.005            | -19.660     | -0.002  |
| <i>Memecylon caeruleum</i>                       | 22.800        | 0.001           | -19.750       | -0.003            | 0.623       | 0.417   |
| <i>Memecylon edule</i>                           | 0.700         | 1.157           | <b>-1.286</b> | <b>-2.098 *</b>   | -0.459      | -0.688  |
| <i>Memecylon scutellatum</i>                     | -0.180        | -0.202          | -1.074        | -1.353            | -1.678      | -1.460  |
| <i>Melaleuca cajuputi</i>                        | -16.310       | -0.003          | -0.237        | -0.161            | -16.170     | -0.005  |
| <i>Syzygium chanlos</i>                          | -0.002        | -0.005          | <b>-1.484</b> | <b>-3.044 **</b>  | -0.031      | -0.063  |
| <i>Syzygium cinereum</i>                         | -14.960       | -0.004          | -19.790       | -0.002            | 17.090      | 0.004   |
| <i>Syzygium cumini</i>                           | 21.490        | 0.001           | -19.530       | -0.003            | -16.230     | -0.005  |
| <i>Syzygium grande</i>                           | -16.990       | -0.006          | -19.610       | -0.004            | -0.982      | -0.829  |
| <i>Syzygium oblatum</i>                          | -17.420       | -0.008          | -19.570       | -0.006            | -0.800      | -0.891  |
| <i>Syzygium syzygioides</i>                      | -17.140       | -0.010          | -19.680       | -0.008            | -1.518      | -1.745  |
| <i>Gluta laccifera</i> _Type B                   | -0.776        | -0.901          | -19.510       | -0.008            | -0.780      | -1.066  |
| <i>Mangifera cochinchinensis</i>                 | 1.199         | 1.865           | <b>-2.104</b> | <b>-2.471 *</b>   | -0.599      | -0.834  |
| <i>Mangifera duperreana</i>                      | -16.240       | -0.004          | -19.440       | -0.003            | 0.549       | 0.368   |

Table S2. continued

| Variable                          | Logging      |                | Mortality     |                   | Recruitment |         |
|-----------------------------------|--------------|----------------|---------------|-------------------|-------------|---------|
|                                   | Coeff.       | z value        | Coeff.        | z value           | Coeff.      | z value |
| <i>Aglaia elaeagnoidea</i>        | -0.880       | -1.393         | -0.747        | -1.304            | -1.077      | -1.434  |
| <i>Aglaia lawii</i>               | -1.231       | -1.591         | -1.121        | -1.581            | 0.662       | 0.966   |
| <i>Sandoricum koetjape</i>        | 0.181        | 0.116          | -19.200       | -0.003            | 0.833       | 0.557   |
| <i>Walsura robusta</i>            | -17.220      | -0.004         | -19.510       | -0.004            | -0.767      | -0.630  |
| <i>Acronychia pedunculata</i>     | 0.072        | 0.085          | -1.269        | -1.610            | -0.393      | -0.477  |
| <i>Nephelium hypoleucum</i>       | -1.002       | -1.554         | <b>-1.976</b> | <b>-3.315 ***</b> | -0.404      | -0.704  |
| <i>Xerospermum noronhianum</i>    | -0.358       | -0.774         | <b>-1.903</b> | <b>-3.846 ***</b> | -0.550      | -1.097  |
| <i>Capparis micracantha</i>       | -18.540      | -0.002         | 19.050        | 0.002             | -15.230     | -0.004  |
| <i>Anisoptera costata</i>         | 0.286        | 0.521          | <b>-3.623</b> | <b>-3.321 ***</b> | -0.574      | -0.967  |
| <i>Dipterocarpus alatus</i>       | -0.810       | -1.275         | -1.354        | -1.945            | -1.351      | -1.570  |
| <i>Dipterocarpus costatus</i>     | -0.454       | -0.667         | <b>-2.825</b> | <b>-2.555 **</b>  | -0.124      | -0.187  |
| <i>Dipterocarpus obtusifolius</i> | <b>1.162</b> | <b>2.475 *</b> | <b>-2.686</b> | <b>-4.557 ***</b> | -0.355      | -0.690  |
| <i>Shorea guiso</i>               | -1.072       | -1.474         | <b>-2.571</b> | <b>-2.313 *</b>   | -1.965      | -1.761  |
| <i>Shorea henryana</i>            | -0.745       | -1.056         | <b>-2.422</b> | <b>-2.141 *</b>   | -1.482      | -1.317  |
| <i>Shorea roxburghii</i>          | -13.690      | -0.011         | -19.640       | -0.003            | 23.940      | 0.000   |
| <i>Vatica odorata</i>             | -0.113       | -0.252         | <b>-1.677</b> | <b>-3.724 ***</b> | -0.669      | -1.362  |
| <i>Heritiera javanica</i>         | -0.495       | -0.600         | -0.939        | -1.189            | -1.536      | -1.356  |
| <i>Microcos tomentosa</i>         | -0.768       | -0.841         | -1.193        | -1.530            | -1.796      | -1.568  |
| <i>Pterospermum lanceifolium</i>  | -17.300      | -0.004         | -19.650       | -0.004            | 0.216       | 0.209   |
| <i>Sterculia stigmatota</i>       | -16.260      | -0.003         | -19.750       | -0.003            | -16.680     | -0.004  |
